1 **Insights into the involvement of spliceosomal mutations in myelodysplastic**  
2 **disorders from an analysis of SACY-1/DDX41 in *Caenorhabditis elegans***

3

4

5 **Tatsuya Tsukamoto,<sup>\*1</sup> Micah D. Gearhart,<sup>\*1</sup> Seongseop Kim,<sup>\*1,2</sup> Gemechu Mekonnen,<sup>\*</sup>**

6 **Caroline A. Spike,<sup>\*</sup> and David Greenstein<sup>\*,3</sup>**

7

8 **\*Department of Genetics, Cell Biology and Development, University of Minnesota, Minneapolis,**

9 **Minnesota 55455, USA**

10 Running title: Genetic analysis of DDX41 in *C. elegans*

11

12 Keywords: SACY-1/DDX-41, spliceosome, myelodysplastic disorders, *C. elegans*

13

14 <sup>1</sup>These authors contributed equally to this work.

15 <sup>2</sup>Present address: OriGene Technologies Inc., 9620 Medical Center Drive, Suite 200, Rockville, MD

16 20850

17 <sup>3</sup>Corresponding author: David Greenstein, Department of Genetics, Cell Biology, and Development,

18 University of Minnesota, 4-208 MCB, 420 Washington Avenue SE, Minneapolis, MN 55455. Tel:

19 612-624-3955; FAX: 612-626-6140. E-mail: [green959@umn.edu](mailto:green959@umn.edu)

20

21 Manuscript Details

22 Tables: 6

23 Figures: 7

24 Words: 16,107

25 References: 104

26

27 Supplemental Information (submitted to FigShare)

28 Supplemental Tables: 5

29 Supplemental Figures: 8

30 Supplemental Files: 3

31 Supplemental Figure Legends

32

### Author Summary

33 Mutations affecting spliceosomal proteins are frequently found in hematological malignancies.  
34 DDX41/Abstrakt is a metazoan-specific spliceosomal DEAD-box RNA helicase recurrently mutated in  
35 inherited and relapsing myelodysplastic syndromes and acute myeloid leukemia. The genetic  
36 properties and genomic impacts of disease-causing mutations in spliceosomal proteins have been  
37 uncertain. Here we conduct a comprehensive molecular genetic analysis of the *C. elegans* DDX41  
38 ortholog, SACY-1. Our results reveal that multiple *sacy-1/DDX41* missense mutations, including the  
39 R525H human oncogenic variant, exhibit antimorphic activity that likely compromises the function of  
40 the spliceosome. The genomic consequences of SACY-1 depletion include splicing- splicing-  
41 independent and splicing-dependent alterations in the transcriptome.

42

## ABSTRACT

43 Mutations affecting spliceosomal proteins are frequently found in hematological malignancies,  
44 including myelodysplastic syndromes and acute myeloid leukemia. DDX41/Abstrakt is a metazoan-  
45 specific spliceosomal DEAD-box RNA helicase found to be recurrently mutated in inherited  
46 myelodysplastic syndromes and in relapsing cases of acute myeloid leukemia. The genetic properties  
47 and genomic impacts of disease-causing missense mutations in DDX41 and other spliceosomal  
48 proteins have been uncertain. Here we conduct a comprehensive molecular genetic analysis of the *C.*  
49 *elegans* DDX41 ortholog, SACY-1. Our results reveal general essential functions for SACY-1 in both  
50 the germline and the soma, as well as specific functions affecting germline sex determination and cell  
51 cycle control. Certain *sacy-1/DDX41* mutations, including the R525H human oncogenic variant, confer  
52 antimorphic activity, suggesting that they compromise the function of the spliceosome. Consistent with  
53 these findings, *sacy-1* exhibits synthetic lethal interactions with several spliceosomal components, and  
54 biochemical analyses suggest that SACY-1 is a component of the *C. elegans* spliceosome. We used the  
55 auxin-inducible degradation system to analyze the impact of SACY-1 on the transcriptome using RNA  
56 sequencing. SACY-1 depletion impacts the transcriptome through splicing-independent and splicing-  
57 dependent mechanisms. The observed transcriptome changes suggest that disruption of spliceosomal  
58 function induces a stress response. Altered 3' splice site usage represents the predominant splicing  
59 defect observed upon SACY-1 depletion, consistent with a role for SACY-1 as a second-step splicing  
60 factor. Missplicing events appear more prevalent in the soma than the germline, suggesting that  
61 surveillance mechanisms protect the germline from aberrant splicing.

62

## INTRODUCTION

63 Mutations affecting components of the spliceosome are frequently found in hematological  
64 malignancies, including myelodysplastic syndromes (MDS; Yoshida *et al.* 2011; reviewed by Yoshida  
65 and Ogawa 2014; Coltri *et al.* 2019), which comprise a heterogeneous set of myeloid neoplasms  
66 characterized by anemia and cytopenia that progress to acute myeloid leukemia (AML) to varying  
67 degrees (Tefferi and Vardiman 2009). The genetic properties and genomic impacts of disease-causing  
68 missense mutations in DDX41 and other spliceosomal proteins have been uncertain. Nonetheless,  
69 mutations affecting spliceosomal components are predictive of poor clinical outcomes in AML patients  
70 (Papaemmanuil *et al.* 2016). Exactly how mutations in spliceosomal components contribute to  
71 malignancy is uncertain, but an attractive model is that aberrant splicing may interrupt tumor  
72 suppressor activity. Importantly, genome sequencing data in patients is currently being used in the  
73 clinic to generate personalized prognoses, with the idea of optimally targeting existing therapies and  
74 generating new treatment strategies (Grinfeld *et al.* 2018). One potential therapeutic approach under  
75 development is the discovery of splicing inhibitors (Effenberger *et al.* 2017; Kim and Abdel-Wahab  
76 2017; DeNicola and Tang 2019). Although mutations affecting several spliceosomal proteins appear to  
77 be beneficial to tumor cells, excessive splicing abnormalities are likely to be lethal to all cells. Splicing  
78 inhibitors have been demonstrated to target tumor cells with splicing mutations by inducing excessive  
79 splicing abnormalities, but cells with intact splicing machinery appear to be resistant to these agents  
80 (Seiler *et al.* 2018). In fact, several new splicing inhibitors are currently in clinical trials.

81 The spliceosomal components frequently affected in MDS include the biochemically well-  
82 defined factors SF3B1, SRSF2, and U2AF1 (Yoshida *et al.* 2011; reviewed by Yoshida and Ogawa  
83 2014). More recent studies have implicated DDX41 (Ding *et al.* 2012; Lewinsohn *et al.* 2015;  
84 Polprasert *et al.* 2015; Cardoso *et al.* 2016; Li *et al.* 2016; Diness *et al.* 2018; reviewed by Maciejewski  
85 *et al.* 2017), a DEAD-box RNA helicase highly conserved in metazoans, whose precise biochemical  
86 function in the spliceosome is less well understood. DDX41 appears to be specifically recruited to the

87 catalytically active C complex (Jurica *et al.* 2002; Bessonov *et al.* 2008), which performs the second  
88 step of splicing in which the 5' and 3' exons are ligated and an intronic lariat is released. DDX41 is  
89 one of many spliceosomal proteins specific to metazoans and not found in budding yeast (Bessonov *et*  
90 *al.* 2008).

91 Whole genome sequencing studies suggest that *DDX41* mutations are associated with  
92 hematological malignancies that are considered to be different clinical entities. For example,  
93 examination of clonal evolution of relapsed AML cases identified *DDX41* as one of several genes  
94 found to be mutated in secondary tumors but not the primary tumors, suggesting it plays a role as a  
95 tumor suppressor and might be causative for disease progression (Ding *et al.* 2012). By contrast,  
96 studies of familial acute myeloid leukemia syndromes suggest that preexisting germline *DDX41*  
97 mutations in trans to newly arising somatic mutations cause the development of hematological  
98 malignancies (Polprasert *et al.* 2015; Cardoso *et al.* 2016; Lewinsohn *et al.* 2016; Li *et al.* 2016).  
99 Germline biallelic *DDX41* missense mutations were recently reported in two siblings that exhibited  
100 intellectual disability, psychomotor delays, and facial and skeletal dysmorphologies, with one sibling  
101 presenting with childhood leukemia (Diness *et al.* 2018). Other work suggests that DDX41 might be a  
102 multifunctional protein; in addition to its nuclear function in RNA splicing, it has been suggested to  
103 function as a cytoplasmic DNA sensor in a signaling pathway in the cytoplasm that detects infecting  
104 double stranded DNA and initiates an antiviral interferon response (Zhang *et al.* 2011; Parvatiyar *et al.*  
105 2012; Stavrou *et al.* 2015, 2018; reviewed by Jiang *et al.* 2017). However, more recent work suggests  
106 that cyclic GMP-AMP synthase (cGAS) functions as the major DNA sensor and is several orders of  
107 magnitude more effective in inducing interferon beta synthesis than DDX41 (Sun *et al.* 2013). Two  
108 studies, one of DDX41 and another of its *Drosophila* ortholog, Abstrakt, suggested a role in regulating  
109 translation of the cyclin-dependent kinase inhibitor p21<sup>WAF1/CIP1</sup> (Peters *et al.* 2017) and the Inscuteable  
110 protein (Irion *et al.* 2004), respectively, though the exact mechanism for these activities has not been  
111 elucidated and indirect effects acting at the level of splicing were not addressed in these studies.

112 To better understand the highly conserved functions of *DDX41*, we undertook a comprehensive  
113 molecular genetic analysis of its ortholog, *sacy-1* in the nematode *Caenorhabditis elegans*. Our prior  
114 studies identified the DEAD-box helicase SACY-1 as a negative regulator of oocyte meiotic  
115 maturation functioning in the germline upstream of the TIS11 CCCH zinc-finger RNA-binding  
116 proteins OMA-1 and OMA-2 (Kim *et al.* 2012). Genetic analysis also established roles for SACY-1 in  
117 regulating the hermaphrodite sperm-to-oocyte switch and in preventing necrotic cell death of gametes.  
118 Genetic experiments further suggested an essential role for *sacy-1(+)* in early embryos and larvae that  
119 appeared to be maternally rescued. At the time of our original study, searchable databases of the  
120 scientific literature had not yet annotated *DDX41* (or its *Drosophila* ortholog, Abstrakt) as  
121 spliceosomal components identified by proteomics. We therefore did not recognize that SACY-1 was  
122 likely involved in splicing.

123 In this study, we undertook a comprehensive molecular genetic analysis of SACY-1's functions  
124 in *C. elegans*. Our results are most consistent with an essential role for SACY-1 in spliceosome  
125 function. Further, our genetic results reveal that certain *sacy-1* mutations appear to confer a dosage-  
126 sensitive antimorphic activity, most consistent with the possibility that they compromise the function  
127 of the spliceosome by perturbing the function of other spliceosomal proteins. The oncogenic R525H  
128 mutation in human *DDX41* was introduced into the *C. elegans* genome using CRISPR-Cas9 genome  
129 editing and found to exhibit weak antagonistic activity. Consistent with these findings, *sacy-1* exhibits  
130 genetic interactions with associated spliceosomal components, and biochemical analyses suggest that  
131 SACY-1 is a component of the *C. elegans* spliceosome. Depletion of SACY-1 in the germline or soma  
132 was found to have major impacts on the transcriptome through splicing-independent and splicing-  
133 dependent mechanisms. Alterations in 3' splice site selection represent the most prevalent changes in  
134 splicing patterns observed following SACY-1 depletion, consistent with its function as a component of  
135 the spliceosomal C complex. Missplicing events are more prevalent upon SACY-1 depletion in the  
136 soma than in the germline, leading us to suggest that surveillance mechanisms protect the germline

137 from aberrant splicing. The observed gene expression changes observed after SACY-1 depletion  
138 suggest that perturbations of spliceosomal function might induce a stress response. Our results, taken  
139 together with a recent study of *sftb-1/SF3B1* (Serrat *et al.* 2019), highlight the potential of the *C.*  
140 *elegans* system for examining the molecular genetic properties of disease-causing mutations affecting  
141 highly conserved components of the spliceosome.



## 142 MATERIALS AND METHODS

### 143 *C. elegans* strains and genetic analysis

144 The genotypes of strains used in this study are reported in Supporting Information, Table S1. Genes  
145 and mutations are described in WormBase ([www.wormbase.org](http://www.wormbase.org); Harris *et al.* 2013) or in the indicated  
146 references. Culture and genetic manipulations were conducted at 20°C unless specified otherwise. The  
147 following mutations were used: LGI–*fog-1(q253ts)*, *dpy-5(e61)*, *gld-1(tn1478)*, *unc-13(e51)*, *unc-*  
148 *13(e1091)*, *lin-41(n2914)*, *lin-41(tn1541[gfp::tev::s-tag::lin-41])*, *sacy-1(tm5503)*, *sacy-1(tn1385)*,  
149 *sacy-1(tn1479)*, *sacy-1(tn1480)*, *sacy-1(tn1481Mog)*, *sacy-1(tn1482)*, *sacy-1(tn1602)*, *sacy-1(tn1603)*,  
150 *sacy-1(tn1604)*, *sacy-1(tn1605)*, *sacy-1(tn1606)*, *sacy-1(tn1607)*, *sacy-1(tn1608)*, *sacy-1(tn1609)*,  
151 *sacy-1(tn1610)*, *sacy-1(tn1611)*, *sacy-1(tn1612)*, *sacy-1(tn1615)*, *sacy-1(tn1616)*, *sacy-1(tn1617)*,  
152 *sacy-1(tn1632[3xFLAG::PreScission protease site::gfp::tev::s-tag::sacy-1])*, *sacy-*  
153 *1(tn1880[aid::gfp::tev::myc::sacy-1])*, and *sacy-1(tn1887)*; LGII–*tra-2(e2020)*, *ieSi57[eft-*  
154 *3p::TIR1::mRuby::unc-54 3'UTR + Cb unc-119(+)]*, *ieSi64[gld-1p::TIR1::mRuby::gld-1 3'UTR + Cb*  
155 *unc-119(+)]*; LGIII–*unc-119(ed3)*; LGIV–*unc-24(e138)*, *fem-3(e1996)*, and *dpy-20(e1282)*; LGV–*acy-*  
156 *4(ok1806)*, *her-1(hv1y101)*, *emb-4(sa44)*, *unc-51(e369)*, and *fog-2(oz40)*. The following  
157 rearrangements were used: *hT2[bli-4(e937) let-(q782) qIs48]* (I;III), *tmC18[dpy-5(tmIs1236) +*  
158 *pmyo-2::mCherry]* I (Dejima *et al.* 2018), *mIn1[dpy-10(e128) mIs14]* II, and *tmC12[egl-9(tmIs1194)*  
159 *+ pmyo-2::Venus]* V (Dejima *et al.* 2018). The following transgenes were used: *tnEx37[acy-4(+)* +  
160 *sur-5::gfp]*, *tnEx159[gfp:sacy-1 + pDPMM0016B(unc-119(+))]*.

161 For the analysis of genetic interactions between *sacy-1(tn1481)* and *fem-3(e1996)*, non-Unc  
162 non-Dpy non-GFP animals from *sacy-1(tn1481)/hT2[bli-4(e937) let-(q782) qIs48]*; *fem-*  
163 *3(e1996)/unc-24(e138) dpy-20(e1282)* were individually cultured and scored for germline phenotypes.  
164 Following scoring, the *fem-3* genotype of each animal was scored by conducting PCR with primers  
165 *fem-3 F2* and *fem-3 R2* and sequencing the products.

166 To map the cold-sensitive (15°C) and temperature-sensitive (25°C) phenotypes of *sacy-*  
167 *1(tn1480)*, 34 Unc non-Dpy recombinants were obtained from *sacy-1(tn1480)/dpy-5(e61) unc-*  
168 *13(e1091)* heterozygotes. The recombinant chromosomes were bred to homozygosity and scored for  
169 the presence or absence of the *sacy-1(tn1480)* mutation by conducting PCR with primers H27M09.1F1  
170 and H27M09.1R4 and sequencing purified PCR products with primer H27M09.1F2. We found that 7  
171 of the 34 recombinants contained *sacy-1(tn1480)* and were cold-sensitive and temperature-sensitive.  
172 By contrast, 27 recombinants were *sacy-1(+)* and grew at 15°C and 25°C. These data indicate that  
173 *sacy-1(tn1480)* mutation is inseparable from the cold-sensitive and temperature-sensitive phenotypes  
174 (e.g., within ~0.06 map units). In addition, 32 Dpy non-Unc recombinants were selected. Interestingly,  
175 all the homozygous recombinants were fertile at both 15°C and 25°C, including the 22 recombinants  
176 that contained the *sacy-1(tn1480)* mutation. Although these *dpy-5(e61) sacy-1(tn1480)* recombinants  
177 grew at 15°C and 25°C, they produced appreciable numbers of dead embryos and grew more slowly  
178 than their *sacy-1(+)* counterparts. This result suggests that the *dpy-5(e61)* mutation suppresses the  
179 cold-sensitive and temperature-sensitive phenotypes of *sacy-1(tn1480)*. Previous work has shown that  
180 mutant alleles of collagen genes can suppress temperature-sensitive mutations in other gene products  
181 possibly by triggering a stress response (Levy *et al.* 1993; Maine and Kimble 1993; Nishiwaki and  
182 Miwa 1998). That *dpy-5(e61)* suppresses *sacy-1(tn1480)* was further shown by constructing *dpy-*  
183 *5(e61) sacy-1(tn1480)/sacy-1(tn1480) unc-13(e1091)* heterozygotes (n=30), of which 20 exhibited the  
184 *sacy-1(tn1480)* sperm-defective phenotype at 25°C and 10 were fertile. Thus, *dpy-5(e61)* exhibits  
185 semidominance for its effects on body morphology and for suppression of *sacy-1(tn1480)*. To examine  
186 the dominant Him phenotype of *sacy-1(tn1480)* and its interaction with *sacy-1(tn1887)*, we compared  
187 the percentage of males produced at 25°C by *dpy-5(e61)/sacy-1(tn1480) unc-13(e1091)* and *dpy-*  
188 *5(e61) sacy-1(tn1887)/sacy-1(tn1480) unc-13(e1091)* heterozygotes.

189

190

191 ***RNA interference***

192 Genome-wide RNA interference (RNAi) screening employed the Ahringer feeding library (Kamath *et*  
193 *al.* 2003) using the RNAi culture media described by Govindan *et al.* (2006) at 22°C. The empty vector  
194 L4440 was used as a control. The identity of RNAi clones was verified by DNA sequencing. Gene-  
195 specific RNAi was performed by placing gravid hermaphrodites on RNAi medium seeded with  
196 double-stranded RNA (dsRNA)-expressing *E. coli* (Timmons and Fire 1998). The gravid  
197 hermaphrodites were immediately treated with 20% bleach to release the F1 embryos. Phenotypes  
198 were assessed 3–4 days later. For quantification of phenotypes, sterility and gamete degeneration were  
199 scored in the F1 generation, and embryonic lethality was scored in the F2 generation produced by the  
200 RNAi-treated F1 animals.

201

202 ***Immunofluorescence, fluorescent labeling, and microscopy***

203 Dissected gonads were fixed in 3% paraformaldehyde as described (Rose *et al.* 1997). Fixed gonads  
204 were stained with rabbit anti-RME-2 antibody (Grant and Hirsh 1999; kindly provided by B. Grant,  
205 Rutgers University, 1:50), a mixture of two purified mouse monoclonal anti-MSP antibodies (Kosinski  
206 *et al.* 2005, each at 1:300), rabbit anti-phospho-histone H3 (Ser10) antibody (Millipore, 1:400).  
207 Secondary antibodies were Alexa 488-conjugated donkey anti-rabbit antibodies (Jackson  
208 ImmunoResearch, 1:500) and Cy3-conjugated goat anti-mouse antibodies (Jackson ImmunoResearch,  
209 1:500). 4', 6-diamidino-2-phenylindole (DAPI) was used to detect DNA. DIC and fluorescent images  
210 were acquired on a Zeiss motorized Axioplan 2 microscope with either a 40x Plan-Neofluar (numerical  
211 aperture 1.3) or a 63x Plan-Apochromat (numerical aperture 1.4) objective lens using a AxioCam  
212 MRm camera and AxioVision software (Zeiss).

213

214

215

216 **Genome editing**

217 CRISPR-Cas9 genome editing used pRB1017 to express single guide RNA (sgRNA) under control of  
218 the *C. elegans* U6 promoter (Arribere *et al.* 2014). The sequences of all oligonucleotides used are  
219 listed in Table S2. To generate sgRNA clones, annealed oligonucleotides were ligated to *Bsa*I-digested  
220 pRB1017 plasmid vector, and the resulting plasmids were verified by Sanger sequencing. pDD162  
221 served as the source of Cas9 expressed under control of the *eef-1A.1/eft-3* promoter (Dickinson *et al.*  
222 2013). Indels were targeted to exon 2 of *sacy-1* using *sacy-1* sgRNA7 (pCS520). The injection mix  
223 contained pCS520 (25 ng/μl), pDD162 (50 ng/μl), and *Pmyo-2::tdTomato* (4 ng/μl). *sacy-1(tn1602–*  
224 *tn1612)* were recovered from injections into DG3913 *lin-41(tn1541[gfp::tev::s-tag::lin-41])* and *sacy-*  
225 *1(tn1615–1617)* were recovered from injections into the wild type (strain N2).

226 An N-terminal *gfp* fusion to endogenous *sacy-1*, *sacy-1(tn1632[3xflag::PreScission protease*  
227 *site::gfp::tev::s-tag::sacy-1])*, was constructed using *sacy-1* sgRNA1 (pCS486) and a repair template  
228 generated by conducting the PCR with oligonucleotide primers *sacy-1* 5HAF and *sacy-1* 3HAR, using  
229 a *gfp::sacy-1::tev::s-tag* recombinereered fosmid (SK212; Kim *et al.* 2012) as template. Genome editing  
230 employed the *dpy-10* co-conversion method (Arribere *et al.* 2014). The injection mix contained pJA58  
231 (7.5 ng/μl), AF-ZF-827 (500 nM), pCS486 (50 ng/μl), repair template (50 ng/μl), and pDD162 (50  
232 ng/μl) and was injected into wild-type worms. Correct targeting was verified by conducting PCR with  
233 primer pairs GFP\_7215 and H27M09.1\_R5 and GFP\_1094R and H27M09.1\_seqF1 followed by DNA  
234 sequencing.

235 An N-terminal auxin-inducible degron (*aid*) fusion to *sacy-1*, *sacy-*  
236 *1(tn1880[aid::gfp::myc::sacy-1])*, was constructed using *sacy-1* sgRNA1 and a repair template  
237 generated by conducting the PCR with oligonucleotide primers *sacy-1* AID5F and *sacy-1* AID3R using  
238 a *wee-1.3::aid::gfp::myc* clone (pCS575, C. Spike, unpublished results) as template. The injection mix  
239 was prepared as described above and was injected into CA1352 worms. *sacy-1 (sacy-*  
240 *1(tn1880[aid::gfp::myc::sacy-1])* was identified by screening the progeny of 414 F1 Roller animals for

241 GFP fluorescence. Correct targeting was verified by conducting PCR with primer pairs GFP\_R1 and  
242 H27M09.1\_F5 and GFP\_F1 and H27M09.1\_R5 followed by DNA sequencing.

243 The R525H mutation in DDX41 was imported into *C. elegans* (e.g., SACY-1[R534H]) using  
244 genome editing (Paix *et al.* 2014) with *sacy-1* sgRNA11 and *sacy-1* sgRNA12 and a single-stranded  
245 repair oligonucleotide (*sacy-1* GM1), which introduces the R534H mutation and two synonymous  
246 changes to alter the protospacer adjacent motif and to facilitate screening using an introduced *Ava*I  
247 restriction site. The injection mix contained pJA58 (7.5 ng/μl), AF-ZF-827 (500 nM), *sacy-1* sgRNA11  
248 (25 ng/μl), *sacy-1* sgRNA12 (25 ng/μl), *sacy-1* GM1 (500 nM), and pDD162 (50 ng/μl) and was  
249 injected into wild-type worms. Edited loci were verified by PCR and DNA sequencing using primers  
250 *sacy-1* seq F1 and *sacy-1* seq R1.

251

### 252 ***Antibody production, purification, and western blotting***

253 *sacy-1* cDNA sequences were cloned into the *E. coli* expression vector pMal-c2 to create an inducible  
254 fusion protein wherein maltose binding protein was fused to amino acids 411–578 of SACY-1  
255 (MBP::SACY-1(411–578)). MBP::SACY-1(411–578) was column and gel-purified and used to  
256 immunize rabbits. Immunizations and sera collection were performed using standard protocols  
257 (Cocalico Biologicals, Inc., Reamstown, PA). Rabbit antibody (R217) was affinity purified and was  
258 suitable in western blots with partially purified SACY-1 preparations. Hybridoma cell lines producing  
259 anti-GFP monoclonal antibodies 12A6 and 4C9 (Sanchez *et al.* 2014) were obtained from the  
260 Developmental Studies Hybridoma Bank and prepared as described (Tsukamoto *et al.* 2017). Proteins  
261 were separated using NuPAGE 4-12% Bis-Tris gels (Invitrogen) and visualized after western blotting.  
262 Blots were blocked with 5% nonfat dried milk. Primary antibodies used to detect proteins were  
263 affinity-purified rabbit anti-SACY-1(411–578) R217 antibody (100 ng/ml) and rabbit anti-GFP  
264 NB600-308 antibody (Novus Biologicals; 250 ng/ml). The secondary antibody used for western blots  
265 was peroxidase-conjugated donkey anti-rabbit antibody (Jackson ImmunoResearch; 1:30,000).

266 Detection was performed using SuperSignal West Femto Maximum Sensitivity Substrate (Thermo  
267 Scientific).

268

### 269 ***SACY-1 tandem affinity purification***

270 Tandem affinity purification of SACY-1 was conducted using strains DG4068 and DG4070 using  
271 modifications of a previously described protocol (Tsukamoto *et al.* 2017). Immunopurified proteins  
272 were precipitated with 16.7% trichloroacetic acid (TCA), washed with acetone at  $-20^{\circ}\text{C}$ , and briefly  
273 separated on a 12% NuPAGE Bis-Tris gel, stained with Colloidal Blue Staining Kit (Invitrogen).  
274 Lanes were subdivided into eight gel slices and mass spectrometry was performed at the Taplin  
275 Biological Mass Spectrometry Facility (Harvard Medical School) using an LTQ Orbitrap Velos Pro  
276 ion-trap mass spectrometer (Thermo Fisher Scientific). Protein identification used the Sequest software  
277 program (Thermo Fisher Scientific) to match the fragmentation pattern of tryptic peptides to the *C.*  
278 *elegans* proteome. The data were filtered to a 1–2% peptide false discovery rate. File S1 reports the  
279 mass spectrometry results and the additional filtering criteria for identifying non-specific interactions.

280

### 281 ***RNA sequencing***

282 The auxin-inducible degradation system (Zhang *et al.* 2015) was used to deplete SACY-1 using strain  
283 backgrounds in which TIR1 was expressed in the germline (CA1352) or soma (CA1200).  
284 Experimental (DG4700 and DG4703) and control strains (CA1352 and CA1200) were grown on  
285 peptone-enriched nematode growth medium with NA22 as a food source. Embryos were isolated by  
286 alkaline hypochlorite treatment (20% bleach and 0.5 N NaOH), washed in M9 buffer and allowed to  
287 hatch overnight in the absence of food. For each of three biological replicates, 60,000 L1-stage larvae  
288 were cultured on two 150- by 15-mm petri dishes containing peptone-enriched medium with OP50.  
289 The worms were grown to the young adult stage and harvested by washing off the plates with M9 and  
290 then placed on fresh plates containing peptone-enriched medium and 2 mM auxin seeded with OP50.

291 Plates were cultured in the dark at 20°C for 24 hours. The worms were then harvested and washed with  
292 M9 repeatedly to reduce the presence of *E. coli*. Total RNA was isolated using TRIzol LS Reagent  
293 (Invitrogen, Carlsbad, CA) and the RNAeasy Micro Kit (QIAGEN, Valencia, CA). Poly(A)+ RNA  
294 was selected from 1 µg of total RNA using the NEBNext Ultra Kit (New England Biolabs, Ipswich,  
295 MA). Libraries were prepared and sequenced by Genewiz (South Plainfield, NJ). Paired-end reads of  
296 150 base pairs (bp) were obtained on an Illumina HiSeq4000 instrument with an average depth greater  
297 than 31 million reads per sample.

298

### 299 ***Bioinformatics***

300 After trimming adapters with Trim Galore (v0.6.0) and cutadapt (v1.18), reads were assessed for  
301 quality with FastQC (v0.11.8), mapped to the WBcel235/ce11 genome with STAR (v2.7.2a) guided by  
302 gene annotations defined in Ensembl (release 97) and sorted and indexed with samtools (v1.7). Gene-  
303 level abundance was estimated for Ensembl defined annotations using the featureCounts function in  
304 the Bioconductor package Rsubread (v1.28.1). An average of 28 million high-quality (MAPQ > 55)  
305 reads mapped to annotated genes within each sample. Principal component analysis and inspection of  
306 5' vs 3' read coverage indicated that one soma control sample (CA1200-2) contained degraded RNA  
307 and was excluded from further analysis. Differential gene expression of Ensembl defined genes was  
308 determined using DESeq2 (v1.26.0). P values were adjusted for multiple test correction using  
309 Benjamini–Hochberg procedure. The fold change, adjusted p values, the mean number of counts across  
310 samples and the number of complementary DNA fragments per kilobase of transcript per million  
311 mapped reads (FPKM) were used to define differentially expressed genes. Gene ontology (GO) data  
312 were obtained from WormBase release WS273 and analyzed taking length bias into account using the  
313 Goseq (v1.38.0) package. Novel transcripts in each of the high quality samples and in the previously  
314 published GSE57109 (Ortiz *et al.* 2014) dataset were identified using StringTie (v2.0.4) and merged  
315 together with the Ensembl annotations to generate a comprehensive annotation set. These annotations

316 were used with RMATS (v4.0.2 turbo) to determine statistically significant differences for splicing  
317 events between conditions [expressed as false discovery rates (FDRs)]. Coverage data was visualized  
318 with Gviz (v 1.30.0). A custom R script with details for the analysis and figure generation is available  
319 at <https://github.com/micahgearhart/sacy1>.

320

321 ***Data availability***

322 Strains and reagents are available upon request. RNA sequencing data have been deposited in NCBI's  
323 Gene Expression Omnibus and are accessible through accession number XXXX.



324

## RESULTS

325 ***Synthetic lethal interactions between a *sacy-1* reduction-of-function allele and several genes***

326 ***encoding spliceosomal proteins***

327 In prior studies, we recovered reduction-of-function (rf) *sacy-1* mutant alleles as suppressors of *acy-4*  
328 sterility (Kim *et al.* 2012). ACY-4 is an adenylate cyclase that functions in the gonadal sheath cells to  
329 promote oocyte growth and meiotic maturation (Govindan *et al.* 2009; Nadarajan *et al.* 2009). *acy-4*  
330 null mutants are sterile, whereas *sacy-1*(rf); *acy-4*(0) mutants are fertile, and this suppression was  
331 shown to involve reduced *sacy-1* function in the germline (Kim *et al.* 2012). *sacy-1*(rf) mutants were  
332 also found to suppress the self-sterility of *fog-2* null mutants that results from a failure to produce  
333 sperm. A sperm-to-oocyte switch governs hermaphrodite germline sex determination. In wild-type  
334 hermaphrodites, the first differentiating germ cells produce sperm in the L4 larval stage, whereas, later  
335 differentiating germ cells exclusively produce oocytes in the adult stage. The suppression of *fog-2*  
336 sterility suggested that *sacy-1* has a function to promote the oocyte fate. Analysis of the *sacy-1(tm5503)*  
337 deletion allele, which is a likely null allele (see below), indicated that *sacy-1* also functions to prevent  
338 necrotic degeneration of sperm and oocytes and is required for fertility of hermaphrodites and males  
339 (Kim *et al.* 2012).

340 To better understand the function of *sacy-1* in multiple germline processes, we conducted a  
341 genome-wide RNAi screen for loci that enhance *sacy-1* mutant phenotypes, such as sterility or  
342 embryonic lethality. Specifically, we screened for loci which caused severe phenotypes when knocked  
343 down by RNAi in the *sacy-1(tm1385rf)* genetic background but not in the wild type. We screened  
344 18,101 RNAi clones from the Ahringer RNAi library and identified five clones that enhanced *sacy-1*  
345 mutant phenotypes when they are knocked down (Table 1). The five RNAi clones target the transcripts  
346 of three genes (Table 1): *mog-2* (one clone), *Y111B2A.25* (one clone), and *emb-4* (three clones). To test  
347 whether *sacy-1* expression and/or localization is affected by RNAi of *mog-2*, *Y111B2A.25*, or *emb-4*,  
348 we conducted RNAi of these genes in *sacy-1(tm5503)* mutant animals expressing the rescuing

349 *gfp::sacy-1* transgene (*tnEx159*). In no case did we observe that an RNAi treatment altered the  
350 expression or localization of the GFP::*SACY-1* transgene; the expression level and predominant  
351 nuclear localization of GFP::*SACY-1* after RNAi was similar to that of the control animals (S. Kim  
352 and D. Greenstein, unpublished results). This result suggests that the RNAi treatments enhance *sacy-*  
353 *1(tn1385)* mutant phenotypes through effects independent of *SACY-1* expression and localization.

354 *mog-2(RNAi)* induces a higher penetrance of sterility, gamete degeneration, and embryonic  
355 lethality in the *sacy-1(tn1385)* mutant genetic background in comparison to the wild type (Table 1;  
356 Figure S1). *mog-2* encodes the U2 snRNP protein A' (Zanetti *et al.* 2011), which is a constitutive  
357 component of the spliceosome (Jurica *et al.* 2002; Bessonov *et al.* 2008, 2010; Herold *et al.* 2009).

358 Similarly, *Y111B2A.25(RNAi)* specifically enhances the penetrance of multiple *sacy-1* mutant  
359 phenotypes, including sterility, gamete degeneration, and embryonic lethality (Table 1; Figure S1).  
360 *Y111B2A.25* is annotated as a pseudogene (Agarwal *et al.* 2010; [www.wormbase.org](http://www.wormbase.org)). *Y111B2A.25* is  
361 part of an operon, and the expressed sequence tag (EST) data show that the *Y111B2A.25* locus is  
362 transcribed, but the transcript lacks protein-coding ability. In *C. elegans* ~40 bp of sequence identity is  
363 sufficient to induce off-target RNAi effects (Rual *et al.* 2007). Use of the Basic Local Alignment  
364 Search Tool (BLAST) indicates that *Y111B2A.25(RNAi)* might target the *cacn-1* locus, which encodes  
365 a spliceosomal protein and shares ~200 bp of sequence identity with *Y111B2A.25*. To test whether the  
366 enhanced sterility induced by *Y111B2A.25(RNAi)* in the *sacy-1(tn1385)* genetic background might be  
367 explained by an off-target effect to *cacn-1*, we conducted *cacn-1(RNAi)* and found that the *cacn-*  
368 *1(RNAi)* induces complete sterility in both the *sacy-1(tn1385)* and wild-type animals (Table 1 and  
369 Figure S1). Interestingly, under the *cacn-1(RNAi)* condition, the *sacy-1(tn1385)* animals show  
370 additional phenotypes, such as high penetrance of a protruding vulva (Pvl) phenotype and slow growth  
371 compared to the wild type, suggesting a genetic interaction between *cacn-1* and *sacy-1* that might be  
372 partially masked by the strong phenotypes induced by *cacn-1(RNAi)*. Thus, we reasoned that the short  
373 identity shared between *Y111B2A.25* and *cacn-1* dsRNA might induce strong sterility in the *sacy-*

374 *I(tn1385rf)* genetic background but not in the wild type through weaker interference with *cacn-1*. To  
375 test this possibility, we systematically reduced the efficacy of the *cacn-1(RNAi)* response by serially  
376 diluting the *cacn-1(RNAi)*-inducing bacteria with bacteria containing the empty vector control (L4440).  
377 Consistent with the possibility that *Y111B2A.25(RNAi)* targets *cacn-1*, limiting the efficacy of the  
378 *cacn-1(RNAi)* response revealed specific enhancement of sterility, gamete degeneration, and  
379 embryonic lethality in the *sacy-1(tn1385)* genetic background (Table S3). Notably, the response to  
380 limited *cacn-1(RNAi)* exhibited by *sacy-1(tn1385)* animals was remarkably similar to their response to  
381 *Y111B2A.25(RNAi)* (Table S3). The human and Drosophila orthologs of CACN-1 have been identified  
382 as components of spliceosomal C complexes (Jurica *et al.* 2002; Bessonov *et al.* 2008, 2010; Herold *et*  
383 *al.* 2009; Fica *et al.* 2019). Like DDX41/Abstrakt, Cactin is recruited to the C complex of the  
384 spliceosome.

385 In addition to *mog-2* and *Y111B2A.25*, we identified three different RNAi clones targeting the  
386 *emb-4* locus as strong enhancers of the *sacy-1(tn1385)* sterility and gamete degeneration phenotypes  
387 (Table 1; Figure S1). *emb-4* encodes a nuclear protein orthologous to human  
388 Aquarius/IBP160/KIAA0560/fSAP164, an intron-binding spliceosomal protein with a helicase-like  
389 domain (Sam *et al.* 1998; Jurica *et al.* 2002; Bessonov *et al.* 2008; Herold *et al.* 2009; De *et al.* 2015;  
390 Haselbach *et al.* 2018). To extend these RNAi results, we examined genetic interactions between *sacy-*  
391 *I* and *emb-4*, employing the *emb-4(sa44)* reduction-of-function allele. When combined with the *sacy-*  
392 *I(tm5503)* null allele, we observed enhancement of lethal vulval rupture and protruding vulva (Pvl)  
393 phenotypes in *sacy-1(tm5503); emb-4(sa44)* double mutants (Table 2A). We also observed  
394 enhancement of these phenotypes in *sacy-1(tn1385); emb-4(sa44)* double mutants, which were derived  
395 from *sacy-1(tn1385)/+; emb-4(sa44)* parents (Table 2A). Interestingly, the F1 progeny of fertile *sacy-*  
396 *I(tn1385); emb-4(sa44)* homozygous adults exclusively produced dead embryos or arrested L1-stage  
397 larvae, unlike each of the single mutants, which were highly fertile (Table 2B). Taken together these

398 genetic interactions between *sacy-1* and three genes encoding spliceosomal proteins suggest that  
399 multiple *sacy-1* mutant phenotypes might result from compromised functions of the spliceosome.

400

#### 401 ***SACY-1 is a component of the C. elegans spliceosome***

402 To characterize SACY-1-associated proteins, we conducted tandem affinity purifications using strains  
403 in which we used CRISPR-Cas9 genome editing to insert 3xFLAG and eGFP affinity tags at the  
404 SACY-1 N-terminus, separated by a PreScission protease recognition sequence (Figure S2). The  
405 resulting *sacy-1(tn1632[3x flag::PreScission::gfp::tev::s-tag::sacy-1])* strain was viable and fertile  
406 and exhibited no apparent germline or somatic defects. Although 3xFLAG::GFP::SACY-1 is expressed  
407 in all cells, it is particularly abundant in the female germline. Thus we conducted purifications from  
408 protein lysates prepared from adult animals in which the germline was feminized (experiment I) and  
409 also from adult hermaphrodites (experiment II). In both experiments, we found that  
410 3xFLAG::GFP::SACY-1 associated with 55 proteins defined as spliceosomal proteins in other systems  
411 (Table 3; Jurica *et al.* 2002; Bessonov *et al.* 2008). The spliceosomal proteins identified in our  
412 genome-wide RNAi screen for *sacy-1* enhancers (MOG-2, EMB-4, and CACN-1), were very well  
413 represented in our purifications (~35–56% peptide coverage; Table 3). We also detected 9 additional  
414 spliceosomal proteins in the purification from the female but not the hermaphrodite genetic  
415 background (Table S4), but this might be a consequence of the fact that more protein extract was used  
416 in that experiment. We also detected 28 other proteins in our tandem affinity purifications (Table S5).  
417 Homologs of several of these factors have been implicated in the regulation of RNA splicing, including  
418 NRDE-2 (Jiao *et al.* 2019), CIR-1 (Maita *et al.* 2005; Kasturi *et al.* 2010), and CDK-12 (Rodrigues *et*  
419 *al.* 2012). These biochemical studies, taken together with the results from the genome-wide RNAi  
420 screen, suggest that both specific and pleiotropic defects conferred by *sacy-1* mutant alleles might  
421 result from spliceosomal defects.

422

423 ***A sacy-1 reduction-of-function mutation enhances the Tumorous phenotype of a gain-of-function***  
424 ***glp-1/Notch allele***

425 Prior work showed that mutational or RNAi treatments affecting the function of multiple spliceosomal  
426 components could enhance weak gain-of-function (gf) mutations in *glp-1/Notch*, resulting in the  
427 ectopic proliferation of undifferentiated germ cells in the proximal gonad arm (Mantina *et al.* 2009;  
428 Kerins *et al.* 2010; Wang *et al.* 2012), which is referred to as a proximal proliferation or Tumorous  
429 phenotype. Thus, we constructed double mutants between the *sacy-1(tn1385)* mutation and the *glp-*  
430 *1(ar202gf)* mutation (Pepper *et al.* 2003). When analyzed in the young adult stage at 15°C (40 hrs  
431 post-L4), very few *glp-1(ar202gf)* adult hermaphrodites (~0.8%) were observed to exhibit a proximal  
432 proliferation phenotype with undifferentiated germ cells in the proximal gonad arm (Table 4). By  
433 contrast, many *sacy-1(tn1385rf); glp-1(ar202gf)* adults (~51%) exhibited a Tumorous phenotype  
434 (Table 4). This phenotype was not observed in *sacy-1(tn1385rf)* single mutants (Table 4). This result is  
435 consistent with the idea that the *sacy-1(tn1385rf)* mutation, though homozygous viable and fertile  
436 (brood size ~350; Kim *et al.* 2012), compromises the function of the spliceosome, as assessed in a  
437 sensitized genetic background.

438

439 ***Reduction-of-function sacy-1 mutations in C. elegans affect highly conserved residues in the***  
440 ***DEAD-box and helicase domains***

441 To better understand the functions and activities of the highly conserved SACY-1/DDX41 protein  
442 (Figure 1B), we conducted forward genetic screens for new *sacy-1* mutations, taking advantage of the  
443 fact that reductions of *sacy-1* function by mutation or RNAi can suppress the self-sterility of *fog-2* null  
444 mutations (Kim *et al.* 2012), which is caused by a failure to produce sperm (Schedl and Kimble 1988).  
445 Thus, we conducted a non-complementation screen for new mutations that enable fertility in trans to  
446 the *sacy-1(tn1385)* reduction-of-function allele in the *fog-2(oz40)* genetic background (Figure S3). In a  
447 screen of 15,577 haploid genomes, we isolated five new *sacy-1* missense alleles (*tn1479–tn1483*;

448 Figure 1; see Table 5 for a list of all *sacy-1* alleles central to this work and their properties). All the  
449 *sacy-1* missense mutations isolated thus far in *C. elegans* alter highly conserved amino acids, and  
450 several of these mutations are nearby or in subdomains of the DEAD-box affected by DDX41  
451 mutations found in human neoplasms (Figure 1B). The *sacy-1* missense alleles were modeled onto the  
452 crystal structures of DEADc and the HELICc domains of DDX41 (Schütz *et al.* 2010; Omura *et al.*  
453 2016) and found likely to be surface accessible (Figure 1C), suggesting that the mutant alleles might  
454 interfere with the function of other protein components of the spliceosome. Consistent with this idea,  
455 the non-complementation screen resulted in the isolation of three novel *sacy-1* alleles (*tn1479*, *tn1480*,  
456 and *tn1481*), which appear to confer antagonistic activities, likely at the level of the spliceosome (see  
457 below).

458         Similar to the *sacy-1(tm5503)* deletion allele which removes exons 2 and 3 and a portion of  
459 exon 4 (Figure 1A; Kim *et al.* 2012), *sacy-1(tn1479)* homozygous hermaphrodites were sterile and  
460 displayed the gamete degeneration phenotype, but with reduced penetrance (Table 6; Figure S4).  
461 Consistent with the idea that *sacy-1(tm5503)* defines the null phenotype, an antibody specific to a  
462 portion of the DEAD-box domain downstream of the *tm5503* deletion (residues 411–578) fails to  
463 detect a protein product in extracts from *sacy-1(tm5503)* adults (Figure S2). To further define the *sacy-*  
464 *1* null phenotype, we used CRISPR/Cas9 genome editing to generate indels upstream of the DEAD-  
465 box-encoding regions by targeting Cas9 double-strand DNA breaks to exon 2 with an efficient sgRNA.  
466 We generated *sacy-1* indels in both wild-type as well as *lin-41(tn1541[gfp::lin-41])* hermaphrodites,  
467 the latter serving to provide a marker for oocyte development (Spike *et al.* 2014a,b). In these  
468 experiments, we generated 14 new *sacy-1* alleles (*tn1602–tn1612* and *tn1615–tn1617*). Of these, 13  
469 displayed the gamete degeneration phenotype, again consistent with this representing the null  
470 phenotype. Not surprisingly, GFP::LIN-41 levels declined and the protein became undetectable as  
471 oocytes degenerated (D. Greenstein, unpublished results). One of the new candidate null alleles, *sacy-*  
472 *1(tn1615)*, was sequenced and found to result from a 10 bp deletion at the end of exon 2, which is

473 predicted to introduce a stop codon prior to the DEAD-box domain, consistent with a null mutation  
474 (Figure 1B). Among the CRISPR-Cas9-induced alleles, *sacy-1(tm1617)* was exceptional in that it was  
475 homozygous viable and fertile, though slow growing, despite the fact that the deletion removes the  
476 initiation codon of *sacy-1* (Figure 1A). This exceptional allele might utilize an alternative start codon  
477 just prior to the DEAD-box domain, although this possibility was not explored. Since null mutations in  
478 *sacy-1* result in hermaphrodite sterility, there is the possibility that maternal *sacy-1(+)* activity  
479 contributes to the development of the germline and soma. Indeed, when the gamete degeneration  
480 phenotype is delayed through germline feminization, the mating of *sacy-1(tm5503)* null females to  
481 wild-type males produces embryos that arrest prior to morphogenesis (Kim *et al.* 2012).

482 One notable difference between *sacy-1(tm1479)* and the *sacy-1(tm5503)* null allele is that the  
483 majority of *sacy-1(tm1479)* adult hermaphrodites die by vulval rupture at 20°C (Table 6; Figure S4).  
484 This phenotype is only observed in a small minority of *sacy-1(tm5503)* hermaphrodites at 20°C but  
485 becomes the predominant phenotype at 15°C (Table 6). This observation suggests that *sacy-1(tm1479)*  
486 is more severe than a null allele, as might happen if the SACY-1[G504E] product is nonfunctional but  
487 also antagonizes a protein complex containing SACY-1, likely the spliceosome.

488 Unlike the *sacy-1(tm5503)* null allele, which is sterile, three of the newly isolated mutations  
489 (*tn1480*, *tn1482*, and *tn1483*) are self-fertile as homozygotes at 20°C similar to the *sacy-1(tm1385rf)*  
490 mutant. However, *sacy-1(tm1480)* and *sacy-1(tm1483)* homozygotes exhibited additional defects; both  
491 appeared to grow more slowly than the wild type at this temperature. In addition, *sacy-1(tm1483)* adult  
492 hermaphrodites had smaller gonad arms, suggesting effects on germline proliferation (T. Tsukamoto  
493 and D. Greenstein, unpublished results). Finally, *sacy-1(tm1480)* confers temperature-dependent gain-  
494 of-function pleiotropic defects that will be described below.

495

496

497

498 ***Novel sacy-1 mutant alleles appear to antagonize essential functions of the spliceosome***

499 ***A recessive gain-of-function sacy-1 mutation masculinizes the hermaphrodite germline:*** In the non-  
500 complementation screen for *sacy-1* mutant alleles, we isolated a novel *sacy-1* allele, *tn1481*, with a  
501 masculinization of germline (Mog) phenotype (Table 6; Figure 2). All *sacy-1(tn1481)* homozygous  
502 hermaphrodites produce excess numbers of sperm but no oocytes (n=125). Staining of dissected  
503 gonads from adults showed that whereas all wild-type hermaphrodite gonad arms examined (n=64)  
504 expressed both the major sperm protein (MSP) and the RME-2 oocyte yolk receptor, all *sacy-*  
505 *1(tn1481)* gonad arms (n=178) expressed only MSP but not RME-2 (Figure 2). In our non-  
506 complementation screen (Figure S3), we also isolated a *gld-1* Mog allele, *tn1478*, as a dominant  
507 suppressor of *fog-2(oz40)*. *gld-1(tn1478)* results from the same G248R amino acid substitution  
508 reported for the *gld-1(q93)* Mog allele (Francis *et al.* 1995a,b; Jones and Schedl 1995). Thus it was  
509 important to determine whether the *sacy-1(tn1481[P222L])* mutation was the cause of the Mog  
510 phenotype. This was ascertained by crossing a GFP::SACY-1 transgene (*tnEx159*) into the *sacy-*  
511 *1(tn1481)* genetic background. We found that all *sacy-1(tn1481); tnEx159 [gfp::sacy-1 +unc-119(+)]*  
512 hermaphrodites (n=30) produced oocytes and sperm and were self-fertile. This result established that  
513 the P222L mutation in SACY-1 causes the Mog phenotype.

514         The suppression of *fog-2* sterility by reduction-of-function *sacy-1* mutations is consistent with  
515 *sacy-1(+)* possessing a function that promotes the oocyte fate; this function is non-essential, however,  
516 because the strongest loss-of-function *sacy-1* alleles are able to produce oocytes, which nevertheless  
517 undergo necrotic degeneration. Thus, the *sacy-1(tn1481)* Mog phenotype suggests this mutant allele,  
518 although recessive, possesses an activity antagonistic to this oocyte-promoting function in the sperm-  
519 to-oocyte switch. To genetically characterize *sacy-1(tn1481)* further, we analyzed the phenotype of  
520 *sacy-1(tn1481)/sacy-1(tm5503 null)* heterozygotes. Whereas all *sacy-1(tn1481)* homozygotes (n=50)  
521 displayed a Mog phenotype, all *sacy-1(tn1481)/sacy-1(tm5503)* heterozygotes (n=48) produced both  
522 oocytes and sperm and were self fertile. This result suggests that the *sacy-1(tn1481)* Mog phenotype is



523 dosage sensitive and that the mutant allele appears to be a recessive gain-of-function mutation that  
524 might antagonize proteins that normally function with SACY-1, likely other components of the  
525 spliceosome as discussed below.

526 In *C. elegans*, a genetic hierarchy controls germline sex determination (Figure 3). The failure of  
527 *sacy-1(RNAi)* to suppress the sterility of the dominant strongly feminizing *tra-2(e2020)* mutation,  
528 which deletes GLD-1 binding sites within the *tra-2 3'-UTR*, was interpreted in the context of a model  
529 in which *sacy-1(+)* promotes the oocyte fate in opposition to *fog-2* and *gld-1* at the level of *tra-2*  
530 (Figure 3; Kim *et al.* 2012). Because the evaluation of potential interactions between *sacy-1* and *tra-2*  
531 relied on *sacy-1(RNAi)*, there was the concern that this treatment reduced but did not eliminate the  
532 function of *sacy-1*. Thus, we reevaluated the interaction between *tra-2* and *sacy-1* genetically. In the  
533 first approach, we combined the *sacy-1(tm5503)* null allele with *tra-2(e2020)*. We analyzed the sexual  
534 fate of the germline by staining dissected gonads from adult animals with oocyte (RME-2) and sperm  
535 (MSP) markers. Whereas all wild-type gonad arms examined (n=30) expressed RME-2 and MSP, all  
536 gonad arms of *sacy-1(tm5503); tra-2(e2020)* animals (n=26) expressed only RME-2 and not MSP  
537 (Figure 4). This result is consistent with the model in which *sacy-1* promotes the oocyte fate by  
538 promoting the function of *tra-2*. Although the germlines of *sacy-1(tm5503); tra-2(e2020)* adults were  
539 feminized, oocytes underwent meiotic maturation constitutively, consistent with the finding that *sacy-1*  
540 is a negative regulator of meiotic maturation (Kim *et al.* 2012). *sacy-1(tm5503); tra-2(e2020)* animals  
541 did however exhibit a highly penetrant ovulation defect, which caused endomitotic oocytes to  
542 accumulate in the gonad arm (Emo phenotype; Figure 4).

543 To extend these observations, we examined germline sexual fates in dissected gonads from  
544 *sacy-1(tn1481Mog); tra-2(e2020)* adults. Whereas all wild-type gonad arms examined (n=21)  
545 expressed MSP and contained sperm, none of the *sacy-1(tn1481Mog); tra-2(e2020)* gonad arms  
546 (n=37) expressed MSP or contained sperm. We noted that the Emo phenotype was less penetrant in  
547 *sacy-1(tn1481Mog); tra-2(e2020)* gonad arms (46% penetrance). These results are consistent with the

548 possibility that *sacy-1(+)* promotes the oocyte fate by promoting the function of *tra-2* in the germline  
549 and suggests that *sacy-1(tn1481Mog)* may interfere with this function.

550 Interestingly, recessive loss-of-function mutations in six genes, *mog-1–6*, cause a Mog  
551 phenotype and encode spliceosomal components (Graham and Kimble 1993; Graham *et al.* 1993; Puoti  
552 and Kimble 1999, 2000; Belfiore *et al.* 2004; Zanetti *et al.* 2011). Mutation and RNAi depletion of  
553 many splicing factors have been observed to result in a Mog phenotype, suggesting that the germline  
554 sex determination process is particularly sensitive to disruptions in RNA splicing (Mantina *et al.* 2009;  
555 Kerins *et al.* 2010; Wang *et al.* 2012; Novak *et al.* 2015). Prior studies focusing on the *C. elegans* soma  
556 were interpreted in the context of a model in which *mog-1–mog-6* might function at the level of *fem-3*  
557 through 3'UTR-dependent translational regulation (Gallegos *et al.* 1998; Figure 3); however, the  
558 experiments in that study did not address the regulation of *fem-3* in the germline. We previously  
559 showed that *sacy-1(tm5503); fem-3(e1996)* adult XX animals had feminized germlines (Kim *et al.*  
560 2012). To examine the genetic relationship between *sacy-1* and *fem-3* further, we generated *sacy-*  
561 *1(tn1481Mog); fem-3(e1996)* double mutants. We observed that 92% (n=23) of *sacy-1(tn1481Mog);*  
562 *fem-3(e1996)* animals were feminized. Mating of *sacy-1(tn1481Mog); fem-3(e1996)* females (n=29) to  
563 wild-type males resulted in the production of embryos that failed to hatch (n=4140, 99.8%) or arrested  
564 as larvae (n=7, 0.2%). This result indicates that two copies of *sacy-1(tn1481)* in the maternal germline,  
565 but not one [e.g., *sacy-1(tn1481)/sacy-1(tm5503)* heterozygotes are fertile] are incompatible with  
566 embryonic development. We found that 8% (n=2) of *sacy-1(tn1481Mog); fem-3(e1996)* animals  
567 (n=25) produced oocytes and sperm and a few dead embryos (one of these animals produced sperm in  
568 one gonad arm but not the other). This result suggests that the *sacy-1(tn1481)* mutation can promote  
569 sperm development independent of zygotic *fem-3(+)* activity, consistent the genetic epistasis pathway  
570 (Figure 3; Zanetti and Puoti 2013). We did observe that a reduction in *fem-3* dosage could suppress the  
571 *sacy-1(tn1481)* Mog phenotype (n=60). Specifically, whereas 65% (n=39) of *sacy-1(tn1481); fem-*  
572 *3(e1996)/+* animals were Mog, exclusively producing sperm, 33% (n=20) produced sperm and

573 oocytes, and one animal (2%) was feminized. Since SACY-1 genetically and biochemically interacts  
574 with components of the spliceosome, we suggest that the *sacy-1(tn1481)* mutation antagonizes  
575 functions of the spliceosome needed for germline sex determination and oogenesis.  
576  
577 ***The gain-of-function sacy-1(tn1480) allele confers multiple pleiotropic phenotypes in a temperature-***  
578 ***dependent manner:*** Interestingly, *sacy-1(tn1480)* displayed both cold-sensitive (15°C) and  
579 temperature-sensitive (25°C) defects. At 15°C, *sacy-1(tn1480)* homozygotes (n=55), which were the  
580 offspring of heterozygous parents grown at 15°C, laid dead eggs and produced arrested larvae (91%) or  
581 produced very few progeny (9%). At 25°C, *sacy-1(tn1480)* hermaphrodites were sterile and produced  
582 abnormal and fertilization-defective sperm (Figure 5). *sacy-1(tn1480)* hermaphrodite sterility is  
583 rescued by mating with wild-type males at 25°C. In addition to producing oocytes, some *sacy-*  
584 *1(tn1480)* adult hermaphrodites continued to produce sperm, as swollen germ cells specified in the  
585 male fate were detected distal to the loop region in 42% of gonad arms examined (Figure 5; n=12).  
586 Thus, in addition to the other phenotypes it confers, the *sacy-1(tn1480)* mutation perturbs the sperm-to-  
587 oocyte switch at 25°C. We also observed that *sacy-1(tn1480)* conferred a dominant high-incidence of  
588 males (Him) phenotype; *sacy-1(tn1480)/+* heterozygous hermaphrodites produced 1.6% male progeny  
589 (n=3759), as compared to 0.1% for the wild-type control (n=6044; p<0.01, Fisher's exact test). Genetic  
590 mapping showed that the temperature-dependent pleiotropic defects were inseparable from the *sacy-*  
591 *1(tn1480)* mutation (see Materials and Methods). Like *sacy-1(tn1481)*, the defects conferred by *sacy-*  
592 *1(tn1480)* were dosage sensitive. At 25°C, nearly all *sacy-1(tn1480)/sacy-1(tm5503)* heterozygotes  
593 (99%, n=88) were fertile (the average brood size was  $132 \pm 64$ , n=34); however, the majority of *sacy-*  
594 *1(tm5503)* homozygotes (85.3%, n=231) they produced burst as adults (Table 6). This result suggests  
595 that maternal *sacy-1(tn1480)* activity can antagonize the spliceosome in the absence of zygotic *sacy-*  
596 *1(+)* function. By these genetic criteria, *sacy-1(tn1480)* exhibits recessive and weakly dominant gain-  
597 of-function properties, depending on the phenotype examined.

598 ***The oncogenic DDX41 R525H mutation confers weak antagonistic activity in C. elegans***

599 The R525H mutation in DDX41 has been reported in myeloid leukemias both as newly arising somatic  
600 mutations specific to the neoplastic cells, as well as inherited germline mutations (Polprasert *et al.*  
601 2015; Lewinsohn *et al.* 2016; Sébert *et al.* 2019). Thus, it was of interest to examine the impact of the  
602 analogous mutation (R534H) on *sacy-1* function. Interestingly, a substitution at the adjacent amino  
603 acid (G533R) results in the *sacy-1(tn1385)* reduction-of-function mutation (Figure 1). Thus, we used  
604 genome editing to introduce the R534H mutation in the *C. elegans* genome (see Materials and  
605 Methods). By several criteria, *sacy-1(tn1887[R534H])* homozygotes were indistinguishable from the  
606 wild type. Neither did *sacy-1(tn1887)* suppress *acy-4* sterility (n=140; *sacy-1(tn1887); acy-4(ok1806)*  
607 brood size was  $1.5 \pm 2.3$ ) nor did it suppress *fog-2* sterility (n=48). All unmated *sacy-1(tn1887); fog-*  
608 *2(oz40)* gonad arms examined (n=96) exhibited stacked oocytes, which indicates that the *sacy-*  
609 *1(tn1887)* mutation does not derepress meiotic maturation in the absence of sperm, like strong  
610 reduction-of-function mutations do. Further, the *sacy-1(tn1887[R534H])* did not enhance the  
611 Tumorous phenotype of a gain-of-function *glp-1/Notch* allele (Table 4). The brood size of *sacy-*  
612 *1(tn1887)* ( $204 \pm 37$ ; n=20) at 25°C was indistinguishable from that of the wild type ( $202 \pm 62$ , n=30;  
613  $p > 0.8$ , two-sample Z-test). Also, the incidence of males (0.2%, n=4087) was similar to that observed in  
614 the wild type (0.1%, n= 6044). When placed in trans to the *sacy-1(tm5503)* null mutation, *sacy-*  
615 *1(tn1887)/sacy-1(tm5503)* heterozygotes were found to be fertile at all temperatures examined (15°,  
616 20°, and 25°C (n=104)). However, we did observe that *sacy-1(tn1887)* significantly enhanced the  
617 dominant Him phenotype of *sacy-1(tn1480)* ( $p < 0.05$ , Fisher's exact test); *sacy-1(tn1887)/sacy-*  
618 *1(tn1480)* heterozygotes produced 5.7% males at 25°C (n=1483) as compared to 1.6% for the *+/sacy-*  
619 *1(tn1480)* control (n=3759). The brood size of *sacy-1(tn1887)/sacy-1(tn1480)* heterozygotes at 25°C  
620 ( $74 \pm 65$ , n=20) was also significantly lower than that of the *+/sacy-1(tn1480)* control ( $188 \pm 68$ , n=20;  
621  $p < 0.001$ , two-sample Z-test). Because, *sacy-1(tn1480)/sacy-1(tm5503)* heterozygotes do not exhibit an

622 enhanced Him phenotype at 25°C (0.7% males, n=4493), the *sacy-1(tn1887[R534H])* mutation appears  
623 to possess a weak antagonistic activity.

624

### 625 ***Impact of sacy-1 on the transcriptome***

626 ***Depletion of SACY-1 using the auxin-inducible degradation system:*** RNA sequencing studies using  
627 human patient samples suggested a role for DDX41 in splice site selection for a small number of  
628 human genes (Polprasert *et al.* 2015). Thus, we sought to address the impact of SACY-1 on the  
629 transcriptome by exploiting the power of the *C. elegans* system for transcriptomics under genotypically  
630 and experimentally well-controlled conditions. We chose to use the auxin-inducible degradation  
631 system (Zhang *et al.* 2015) to acutely deplete SACY-1 in the adult stage and thus avoid indirect  
632 impacts on the transcriptome arising as a developmental consequence of strong loss-of-function  
633 phenotypes (e.g., germline degeneration and cell fate changes). Because the genetic analysis  
634 established requirements for *sacy-1(+)* function in both the germline and soma, we used strains bearing  
635 germline (CA1352 *ieSi64*) or somatically expressed (CA1200 *ieSi57*) TIR1 F-box proteins to deplete  
636 AID::GFP::SACY-1 in each tissue individually (Figure S5 and Figure S6). Depletion of  
637 AID::GFP::SACY-1 in the germline starting at approximately the L3 stage phenocopied the gamete  
638 degeneration phenotype in a small proportion of the animals (3 of 270; Figure S5). This result is  
639 consistent with genetic mosaic analysis showing that the gamete degeneration phenotype is cell  
640 autonomous (Kim *et al.* 2012), and it also highlights the difficulty of recapitulating null phenotypes  
641 through auxin-inducible degradation. When AID::GFP::SACY-1 is depleted in the germline starting at  
642 the L4 stage, many of their F1 progeny arrest as embryos or larvae, consistent with the idea that  
643 maternally contributed *sacy-1(+)* activity is essential. Animals that escape the lethality and progress to  
644 adulthood often display the germline degeneration phenotype (40%; n=139). To deplete  
645 AID::GFP::SACY-1 in the soma, we placed L4 larvae on media containing 2 mM auxin. The resulting  
646 F1 progeny grew very slowly, taking approximately 4–6 days to reach adulthood (instead of 2.5 days)

647 and were sterile (Figure S5). Taken together, depletion of SACY-1 using the auxin-inducible  
648 degradation system resulted in a reduction-of-function condition less severe than the null phenotype  
649 but more severe than conferred by the reduction-of-function missense alleles (Table 5).

650 For analysis of transcriptomes, we grew adult hermaphrodites to the young adult stage on  
651 normal growth media and then transferred them to media containing 2 mM auxin for 24 hours before  
652 preparing total RNA for RNA sequencing. Examination of the worms showed that AID::GFP::SACY-  
653 1 was depleted from the targeted tissues (Figure S6). Total RNA was prepared from each of three  
654 biological replicates and their respective controls, which were the parent strains expressing TIR1 in the  
655 germline (*ieSi64*) or soma (*ieSi57*) also treated with auxin. Poly(A<sup>+</sup>) mRNA was sequenced using 150  
656 bp paired-end reads and the sequencing reads were aligned to the genome. Principal component  
657 analysis (PCA) revealed that the biological replicates clustered together (Figure 6A), which is  
658 indicative of experimental reproducibility. However, PCA indicated that the control strains for the  
659 germline (CA1352) and soma (CA1200) depleted samples did not cluster together, which indicates that  
660 under these conditions the two strain backgrounds exhibit marked differences in their transcriptomes  
661 (Figure 6A), a finding that was further confirmed with a more granular assessment of mRNA  
662 expression level differences of individual genes (Figure S7A). Thus, in our analysis we compared the  
663 germline- and soma-depleted SACY-1 transcriptomes only to their respective controls.

664  
665 ***Changes in transcript abundance following SACY-1 depletion:*** We observed two classes of  
666 transcriptome alterations upon depletion of SACY-1 in the germline or soma: changes in transcript  
667 abundance and alterations in splicing patterns. In terms of transcript abundance, we observed 242  
668 down-regulated genes (two-fold down-regulation, adjusted  $p < 0.05$ , FPKM in soma control  $\geq 2.5$ , mean  
669 counts across samples  $> 25$ ) in the RNA samples depleted for somatic SACY-1 (Figure 6, B and C;  
670 File S2). Notably these down-regulated genes included many cuticle collagen genes and genes  
671 affecting cuticular morphology and body size (*col-17*, *col-41*, *col-46*, *col-47*, *col-90*, *col-128*, *col-149*,

672 *dpy-3, dpy-4, dpy-5, dpy-6, dpy-8, dpy-9, dpy-13, dpy-20, lon-3, mlt-7, qua-1, rol-6, rol-8, sqt-1*, and  
673 *sqt-2*). Consistent with this observation, the top enriched gene ontology (GO) term for transcripts  
674 reduced in abundance in the SACY-1 soma-depleted samples was “cuticle development involved in  
675 collagen and cuticulin-based cuticle molting cycle” (Figure S7B). We also observed 242 up-regulated  
676 genes (two-fold up-regulation, adjusted  $p < 0.05$ , FPKM in SACY-1 soma-deplete  $\geq 2.5$ , mean counts  
677 across samples  $> 25$ ) in the SACY-1 soma-depleted samples (Figure 6, B and C; File S2). The top  
678 enriched GO term for transcripts with increased abundance in the SACY-1 soma-depleted samples  
679 related to cellular responses to heat stress, the unfolded protein response, and innate immune responses  
680 (Figure S7), suggesting that the organism might perceive the reduction of *sacy-1(+)* function as a  
681 stressor and might then mount a response that then alters the transcriptome.

682 In the SACY-1 germline-depleted samples, we observed 126 down-regulated genes (two-fold  
683 down-regulation, adjusted  $p < 0.05$ , FPKM in germline control  $\geq 2.5$ , mean counts across samples  $> 25$ ;  
684 Figure 6, B and D; File S2). The top enriched GO terms for transcripts with decreased abundance in  
685 the SACY-1 germline-depleted samples included the response to heat stress and the unfolded protein  
686 response (Figure S7B), suggesting the response to *sacy-1(+)* depletion differs between the soma and  
687 germline. Among the 311 transcripts increased in abundance in the SACY-1 germline-depleted sample  
688 was *her-1* (two-fold up-regulation, adjusted  $p < 0.05$ , FPKM in SACY-1 germline-deplete  $\geq 2.5$ , mean  
689 counts across samples  $> 25$ ; Figure 6, B, D, and E; File S2). This might be due to an increase in X  
690 chromosome non-disjunction in embryos located in the uterus following germline depletion of *sacy-*  
691 *1(+)*, but this possibility was not investigated. Because *her-1* likely encodes an inhibitory ligand for  
692 the TRA-2 receptor in the sex-determination pathway (Perry *et al.* 1993; Figure 3), we tested whether  
693 the *her-1(hv1y101)* null mutation could suppress the Mog phenotype of the recessive gain-of-function  
694 *sacy-1(tn1481)* mutation, but this proved not to be the case ( $n=53$  gonad arms). Since the genetic  
695 epistasis results suggest that SACY-1 promotes the expression of TRA-2 (Figure 3), we examined the  
696 effect of SACY-1 depletion in the germline on the levels of *tra-2* mRNA and the fidelity of its

697 splicing. We observed no statistically significant change in *tra-2* mRNA levels or its splicing patterns  
698 (Figure 6F). We did not examine the expression of TRA-2 protein after SACY-1 depletion because a  
699 recent study suggested that TRA-2 protein expression in the wild-type germline is below the  
700 immunofluorescence detection limit of immunofluorescence (Hu *et al.* 2019).

701

702 ***Alteration of splicing patterns following SACY-1 depletion:*** In the SACY-1 soma-depleted samples,  
703 we observed significant (FDR<0.05) alterations in splicing patterns for 1606 transcripts (Figure 7A).  
704 These splicing alterations fell into several broad classes: the use of alternative 5' splice sites, the use of  
705 alternative 3' splice sites, abnormal splicing within an exon, skipped exons, and retained introns. The  
706 largest class of splicing changes was the use of alternative 3' splice sites, consistent with the fact that  
707 DDX41 was shown to be recruited to the C complex, which mediates the second step in splicing  
708 (Bessonov *et al.* 2008). Multiple splicing defects were sometimes observed within a single gene. For  
709 example, in the case of the RNA-binding protein ETR-1, which has multiple isoforms and is expressed  
710 in the soma and germline (Boateng *et al.* 2017), depletion of SACY-1 results in intron retention and  
711 multiple alterations in 3'-splice-site usage (Figure 7B). In the SACY-1 germline-depleted samples we  
712 observed significant (FDR<0.05) alterations in splicing for 796 transcripts (Figure 7A). Thus, splicing  
713 defects appeared less prevalent in the SACY-1 germline-depleted samples than the SACY-1 soma-  
714 depleted samples. One possibility is that nonsense mediated decay or other surveillance pathways  
715 actively clear misspliced mRNAs from the germline. Some alternative splicing events were observed  
716 in both the RNA preparations depleted for SACY-1 in the germline and the soma (Figure 7A). For  
717 example, we observed retention of an intron in *prdx-6* mRNA in both experiments (Figure 7C).  
718 Likewise, we observed alternative 3' splice site selection for the heterochronic gene *lin-28* in both  
719 SACY-1-depleted samples (Figure 7D).

720



721 ***Germline sex-specific splicing patterns and the involvement of SACY-1:*** As we analyzed the changes  
722 in splicing patterns following SACY-1, we noticed changes in alternative splicing patterns that  
723 appeared to correlate with the sex of the germline. To investigate this observation more fully, we  
724 reanalyzed the data of Ortiz *et al.* (2014), who reported the transcriptomes of genotypically XX  
725 animals exclusively undergoing oogenesis or spermatogenesis as a consequence of containing a loss-  
726 of-function *fog-2* mutation or a gain-of-function *fem-3* mutation, respectively. This dataset was  
727 previously used to identify alternative isoform usage in the germline (Ortiz *et al.* 2014). In analyzing  
728 their dataset for alternative splicing events, we observed 1600 genes for which there was a significant  
729 (FDR<0.05) germline sex-specific splicing pattern (Figure S8; File S3). We noted that upon SACY-1  
730 depletion in either the soma or germline, oocyte-enriched splicing events were favored (Figure 7A and  
731 Figure S8). This result suggests that SACY-1 plays a role in the selection of 3' splice sites for many  
732 genes and raises the possibility that the appropriate balance of “spliceoforms” may be play a role in  
733 cellular differentiation.

734

## DISCUSSION

735 In this study, we report the results of a molecular genetic and biochemical analysis of SACY-1/DDX41  
736 in *C. elegans*, conducted to gain potential insights into how *DDX41* mutations might contribute to  
737 MDS and AML in humans. *DDX41* is a component of the spliceosomal C complex (Jurica *et al.* 2002;  
738 Bessonov *et al.* 2008), which carries out the second step in splicing. Pre-mRNA splicing is an essential  
739 process in eukaryotes (reviewed by Wahl *et al.* 2009). Thus, the finding that mutations in highly  
740 conserved genes encoding spliceosomal components are frequently found in hematological  
741 malignancies was unexpected (reviewed by Yoshida and Ogawa 2014). Unfortunately, the genetic  
742 properties of disease-causing mutations in spliceosomal proteins have been difficult to assess.  
743 Nonetheless, the observation that many of these missense mutations map to highly conserved amino  
744 acids, within biochemically defined structural and functional domains, might suggest that they reduce  
745 but not eliminate gene function. An alternative possibility is that some of the oncogenic missense  
746 mutations might confer antagonistic gain-of-function properties. Indeed, oncogenic mutations in  
747 several splicing factors (e.g., SF3B1, U2AF1, SRSDF2, and SRSR2) present in the heterozygous  
748 condition (Yoshida and Ogaawa 2014); however, it is probable that newly arising mutations in  
749 hematopoietic lineages, in combination with the germline mutations, contribute to neoplastic  
750 development.

751 In this regard, the *DDX41* mutations inherited and arising in familial cases of AML are  
752 particularly informative (Polprasert *et al.* 2015). Affected individuals often inherit one copy containing  
753 a mutation, which is likely to be a null mutation (e.g., a frameshift mutation, pD140fs). In addition to  
754 this *DDX41* germline mutation, the neoplasms in these patients invariably contain a second copy with a  
755 somatic mutation that arose in the hematopoietic lineage. Several specific *DDX41* somatic mutations  
756 (e.g., R525H) arise independently with high prevalence, suggesting that they markedly contribute to  
757 neoplastic development. These somatic *DDX41* mutations are invariably missense mutations affecting  
758 conserved amino acids but have never been found to include candidate null alleles (e.g., frameshift

759 mutations or premature termination codons). Thus, these somatically arising mutations are unlikely to  
760 eliminate DDX41 function. The presumption is that biallelic mutations disrupting DDX41 function  
761 might be lethal. In line with this view, a recent report found that two related patients with biallelic  
762 DDX41 missense mutations exhibited a more severe syndrome characterized by dysmorphic skeletal  
763 and facial features, psychomotor delays, intellectual disability, and early onset leukemia (Diness *et al.*  
764 2018).

765         Here we build upon our prior work (Kim *et al.* 2012) to conduct a comprehensive molecular  
766 genetic analysis of SACY-1/DDX41 function in *C. elegans*. Recent work of others has used the *C.*  
767 *elegans* system to gain information on oncogenic mutations in the SF3B1 spliceosomal protein (Serrat  
768 *et al.* 2019). Our results reveal that *sacy-1* mutations confer a range of phenotypes, from highly  
769 pleiotropic defects affecting the germline and soma to very specific defects affecting cell  
770 differentiation and cell cycle regulation. Reduction-of-function *sacy-1* alleles are homozygous viable  
771 and fertile, yet affect germline sex determination and the regulation of oocyte meiotic maturation (Kim  
772 *et al.* 2012; this work). Animals homozygous for *sacy-1* null mutations grow to adulthood but exhibit a  
773 gamete degeneration phenotype and are sterile. Feminization of the germline delays oocyte  
774 degeneration, which enables *sacy-1* null mutant females to be mated and produce embryos. However,  
775 these embryos invariably die, revealing an essential maternal requirement for development. Maternally  
776 provided *sacy-1(+)* must in turn be sufficient for homozygous *sacy-1* null mutant animals (produced  
777 from heterozygous parents) to grow to adulthood.

778         Several *sacy-1* mutant alleles exhibit genetic properties that suggest they can counteract *sacy-*  
779 *1(+)* function, potentially by compromising the function of the spliceosome. Most notable among these  
780 mutations is *sacy-1(tn1481)*, which confers a masculinization of the germline phenotype resulting from  
781 the overproduction of sperm to the exclusion of the oocyte fate. Since multiple reduction-of-function  
782 *sacy-1* alleles suppress the feminization of the germline phenotype caused by null mutations in *fog-2*  
783 (Kim *et al.* 2012; this work), *sacy-1(+)* must possess a function to promote the oocyte fate. This

784 oocyte-promoting function of *sacy-1(+)* might not be essential because *sacy-1* null mutants produce  
785 oocytes, which nonetheless undergo necrotic degeneration. The caveat here is that *sacy-1* null mutants  
786 only develop to adulthood because of maternally provided *sacy-1(+)*, which might be sufficient to  
787 promote oogenesis. In any case, the *sacy-1(tn1481)* mutation might disrupt an oocyte-promoting  
788 function either by interfering with maternally provided SACY-1 activity or proteins with which it  
789 associates.

790         Several observations are consistent with the possibility that *sacy-1(tn1481)* interferes with or  
791 compromises the function of the spliceosome in germline sex determination in a dosage-sensitive  
792 manner. This view is also supported by our tandem affinity purification results showing that SACY-1  
793 is a component of the *C. elegans* spliceosome and genetically interacts with spliceosomal components.  
794 Significantly, multiple *C. elegans* spliceosomal components, functioning at different steps of the  
795 splicing reaction, can mutate to a masculinization of germline phenotype (reviewed by Zanetti and  
796 Puoti 2013). Interestingly, when placed in trans to a *sacy-1* null mutation (e.g., *tm5503*), the resulting  
797 *sacy-1(tn1481)/sacy-1(tm5503)* heterozygous animals are viable and fertile and can be maintained  
798 indefinitely as a heterozygous strain. This highly informative genetic result suggests that a single dose  
799 of *sacy-1(tn1481)* can mediate all its essential functions, but that two doses of the mutant protein  
800 interferes with the normal mechanisms of germline sex determination (i.e., *sacy-1(tn1481)* is a  
801 recessive gain-of-function antimorphic mutation). Although *sacy-1(tn1481)/sacy-1(tm5503)*  
802 heterozygous adult hermaphrodites are fertile, when *sacy-1(tn1481); fem-3(e1996)* females are mated  
803 to wild-type males, they produce embryos that invariably fail to hatch. Similar results are obtained  
804 with the six other *mog* genes (Graham and Kimble 1993; Graham *et al.* 1993), which encode  
805 spliceosomal proteins (Puoti and Kimble 1999; Puoti and Kimble 2000; Belfiore *et al.* 2004; Kasturi *et*  
806 *al.* 2010; Zanetti *et al.* 2011). Interestingly the P222L amino acid substitution found in *sacy-1(tn1481)*  
807 is adjacent to the Q motif, which participates in nucleotide binding and hydrolysis (Schütz *et al.* 2010).  
808 It is tempting to speculate that SACY-1/DDX41 might promote remodeling of spliceosomes during the

809 splicing reaction and that two doses of SACY-1 P222L might disrupt these rearrangements. In a  
810 similar vein, *sacy-1(tn1479[G504E])* exhibits a phenotype more severe than a null allele, suggesting  
811 that this mutation in the helicase domain too might possess a dosage-sensitive antimorphic activity.  
812 Whether missense alleles in human DDX41 also possess antimorphic activity will require additional  
813 work, including biochemical analyses.

814 We imported the oncogenic *DDX41*[R525H] mutation into *C. elegans* using CRISPR-Cas9  
815 genome editing (R534H in SACY-1). Our analysis revealed that in *C. elegans*, this mutation possesses  
816 very weak antagonistic activity. While it is possible that the genetic properties of this mutation might  
817 differ between *C. elegans* and mammalian systems, it is worthwhile noting that the oncogenic variant  
818 must support the high levels of proliferation characteristic of neoplastic cells. While all the *sacy-1*  
819 mutations we isolated in forward genetic screens occur at conserved amino acids, none of them match  
820 the oncogenic mutations thus far isolated (Polprasert *et al.* 2015; Cardoso *et al.* 2016; Lewinsohn *et al.*  
821 2016; Li *et al.* 2016; Diness *et al.* 2018 ; Sébert *et al.* 2019). This observation is consistent with the  
822 idea that the oncogenic mutations are at most weakly antagonizing or weak reduction-of-function  
823 mutations, and thus would not have been isolated in forward genetic screens that require a substantial  
824 reduction in function.

825 An attractive idea is that oncogenic mutations affecting the spliceosome contribute to  
826 neoplastic development through effects on gene expression occurring through alterations in RNA  
827 splicing, as well as effects on the transcriptional machinery or RNA stability (Yoshimi *et al.* 2019).  
828 Consistent with this idea, RNAi depletion of the *C. elegans* spliceosomal protein RSR-2 affects  
829 transcript levels without major impacts on splicing (Fontrodona *et al.* 2013). In this study, we  
830 examined the effects of SACY-1 depletion at the adult stage on the transcriptome. In the soma and the  
831 germline, we observed splicing-independent impacts on the abundance of many transcripts. The gene  
832 expression changes observed suggest that depletion of SACY-1 might elicit a stress response. If  
833 analogous processes occur after perturbations of the spliceosome in humans, such stress responses

834 might contribute to oncogenesis and could represent therapeutic targets. In *C. elegans*, we observed  
835 instances of missplicing following SACY-1 depletion, though missplicing events more prevalent when  
836 SACY-1 was depleted from the soma as compared to the germline. The extent to which gene  
837 expression changes and splicing alterations contribute to the various *sacy-1* mutant phenotypes will  
838 require further study but will likely provide insights relevant to spliceosomal perturbations in humans.

839

## ACKNOWLEDGMENTS

840 This paper is dedicated to the memory of Michael A. Miller, our colleague and friend whose scientific  
841 contributions will not be forgotten. We thank Donna Coetzee for technical assistance. We are grateful  
842 to Joshua Arribere, Daniel Dickinson, Barth Grant, Tim Schedl, and Jordan Ward for providing strains  
843 or reagents. Some strains were provided by the Caenorhabditis Genetics Center, which is funded by  
844 grant P40OD010440 from the NIH Office of Research Infrastructure Programs. We thank Gabriela  
845 Huelgas-Morales, Zohar Sachs, and Todd Starich for their helpful suggestions for the manuscript. This  
846 work was supported by NIH grant GM57173 to D.G.

847

## LITERATURE CITED

- 848 Agarwal, A., D. Koppstein, J. Rozowsky, A. Sboner, L. Habegger *et al.*, 2010 Comparison and  
849 calibration of transcriptome data from RNA-Seq and tiling arrays. *BMC Genomics* 11: 383.
- 850 Arribere, J. A., R. T. Bell, B. X. Fu, K. L. Artiles, P. S. Hartman *et al.*, 2014 Efficient marker-free  
851 recovery of custom genetic modifications with CRISPR/Cas9 in *Caenorhabditis elegans*.  
852 *Genetics* 198: 837–846.
- 853 Belfiore, M., P. Pugnale, Z. Saudan, and A. Puoti, 2004 Roles of the *C. elegans* cyclophilin-like  
854 protein MOG-6 in MEP-1 binding and germline fates. *Development* 131: 2935–2945.
- 855 Bertram, K., D. E. Agafonov, W.-T. Liu, O. Dybkov, C. L. Will *et al.*, 2017 Cro-EM structure of a  
856 human spliceosome activated for step 2 of splicing. *Nature* 542: 318–323.
- 857 Bessonov, S., M. Anokhina, A. Krasauskas, M. M. Golas, B. Sander *et al.*, 2010 Characterization of  
858 purified human B<sup>act</sup> spliceosomal complexes reveals compositional and morphological changes  
859 during spliceosome activation and first step catalysis. *RNA* 16: 2384–2403.
- 860 Bessonov, S., M. Anokhina, C. L. Will, H. Urlaub, and R. Lührmann, 2008 Isolation of an active step I  
861 spliceosome and composition of its RNP core. *Nature* 452: 846–850.
- 862 Boateng, R., K. C. Q. Nguyen, D. H. Hall, A. Golden, and A. K. Allen, 2017 Novel functions for the  
863 RNA-binding protein ETR-1 in *Caenorhabditis elegans* reproduction and engulfment of  
864 germline apoptotic corpses. *Dev. Biol.* 429: 306–320.
- 865 Cardoso, S. R., G. Ryan, A. J. Walne, A. Ellison, R. Lowe *et al.*, 2016 Germline heterozygous *DDX41*  
866 variants in a subset of familial myelodysplasia and acute myeloid leukemia. *Leukemia* 30:  
867 2083–2086.
- 868 Chaudhary, N., C. McMahon, and G. Blobel, 1991 Primary structure of a human arginine-rich nuclear  
869 protein that colocalizes with spliceosome components. *Proc. Natl. Acad. Sci. USA* 88: 8189–  
870 8193.
- 871 Coltri, P. P., M. G. P. dos Santos, and G. H. G. da Silva, 2019 Splicing and cancer: challenges and



- 872 opportunities. WIREs RNA 10: e1527.
- 873 De, I., S. Bessonov, R. Hofele, K. dos Santos, C. L. Will *et al.*, 2015 The RNA helicase Aquarius  
874 exhibits structural adaptations mediating its recruitment to spliceosomes. Nat. Struct. Mol. Biol.  
875 22: 138–144.
- 876 Dejima, K., S. Hori, S. Iwata, Y. Suehiro, S. Yoshina *et al.*, 2018 An aneuploidy-free and structurally  
877 defined balancer chromosome toolkit for *Caenorhabditis elegans*. Cell Rep. 22: 232–241.
- 878 DeNicola, A. B., and Y. Tang, 2019 Therapeutic approaches to treat human spliceosomal diseases.  
879 Curr. Opin. Biotechnol. 60: 72–81.
- 880 Dickinson, D. J., J. D. Ward, D. J. Reiner, and B. Goldstein, 2013 Engineering the *Caenorhabditis*  
881 *elegans* genome using Cas9-triggered homologous recombination. Nat. Methods 10: 1028–  
882 1034.
- 883 Diness, B. R., L. Risom, T. L. Frandsen, B. Hansen, M. K. Andersen *et al.*, 2018 Putative new  
884 childhood leukemia cancer predisposition syndrome caused by germline bi-allelic missense  
885 mutations in *DDX41*. Genes Chromosomes Cancer 57: 670–674.
- 886 Ding, L., T. J. Ley, D. E. Larson, C. A. Miller, D. C. Koboldt, *et al.*, 2012 Clonal evolution in relapsed  
887 acute myeloid leukaemia revealed by whole-genome sequencing. Nature 481: 506-510.
- 888 Effenberger, K. A., V. K. Urabe, and M. S. Jurica, 2017 Modulating splicing with small molecular  
889 inhibitors of the spliceosome. WIREs RNA 8: e1381.
- 890 Fabrizio, P., J. Dannenberg, P. Dube, B. Kastner, H. Stark *et al.*, 2009 The evolutionarily conserved  
891 core design of the catalytic activation step of the yeast spliceosome. Mol. Cell 36: 593–608.
- 892 Fica, S. M., C. Oubridge, M. E. Wilkinson, A. J. Newman, and K. Nagai, 2019 A human postcatalytic  
893 spliceosome structure reveals essential roles of metazoan factors for exon ligation. Science 363:  
894 710–714.
- 895 Fontrodona, L., M. Porta-de-la-Riva, T. Morán, W. Niu, M. Díaz *et al.*, 2013 RSR-2, the  
896 *Caenorhabditis elegans* ortholog of human spliceosomal component SRm300/SRRM2,

- 897 regulates development by influencing the transcriptional machinery. *PloS Genetics* 9:  
898 e1003543.
- 899 Francis, R., E. Maine, and T. Schedl, 1995a Analysis of the multiple roles of *gld-1* in germline  
900 development: interactions with the sex determination cascade and the *glp-1* signaling pathway.  
901 *Genetics* 139: 607–630.
- 902 Francis, R., M. K. Barton, J. Kimble, and T. Schedl, 1995b *gld-1*, a tumor suppressor gene required for  
903 oocyte development in *Caenorhabditis elegans*. *Genetics* 139: 579–606.
- 904 Gallegos, M., J. Ahringer, S. Crittenden, and J. Kimble, 1998 Repression by the 3' UTR of *fem-3*, a  
905 sex-determining gene, relies on a ubiquitous *mog*-dependent control in *Caenorhabditis elegans*.  
906 *EMBO J.* 17: 6337–6347.
- 907 Govindan, J. A., H. Cheng, J. E. Harris, and D. Greenstein, 2006  $G\alpha_{o/i}$  and  $G\alpha_s$  signaling function in  
908 parallel with the MSP/Eph receptor to control meiotic diapause in *C. elegans*. *Curr. Biol.* 16:  
909 1257–1268.
- 910 Govindan, J. A., S. Nadarajan, S. Kim, T. A. Starich, and D. Greenstein, 2009 Somatic cAMP  
911 signaling regulates MSP-dependent oocyte growth and meiotic maturation in *C. elegans*.  
912 *Development* 136: 2211–2221.
- 913 Graham, P. L., and J. Kimble, 1993 The *mog-1* gene is required for the switch from spermatogenesis to  
914 oogenesis in *Caenorhabditis elegans*. *Genetics* 133: 919–931.
- 915 Graham, P. L., T. Schedl, and J. Kimble, 1993 More *mog* genes that influence the switch from  
916 spermatogenesis to oogenesis in *Caenorhabditis elegans*. *Dev. Genet.* 14: 471–484.
- 917 Grant, B., and D. Hirsh, 1999 Receptor-mediated endocytosis in the *Caenorhabditis elegans* oocyte.  
918 *Mol. Biol. Cell* 10: 4311–4326.
- 919 Grainger, R. J., and J. D. Beggs, 2005 Prp8 protein: at the heart of the spliceosome. *RNA* 11: 533–557.
- 920 Grinfeld, J., J. Nangalia, E. J. Baxter, D. C. Wedge, N. Angelopoulos *et al.*, 2018 Classification and  
921 personalized prognosis in myeloproliferative neoplasms. *N. Engl. J. Med.* 379: 1416–1430.

- 922 Harris, T. W., J. Baran, T. Bieri, A. Cabunoc, J. Chan *et al.*, 2013 WormBase 2014: new views of  
923 curated biology. *Nucleic Acids Res.* 42: D789–D793.
- 924 Haselbach, D., I. Komarov, D. E. Agafonov, K. Hartmuth, B. Graf *et al.*, 2018 Structure and  
925 conformational dynamics of the human spliceosomal B<sup>act</sup> complex. *Cell* 172: 454–464.
- 926 Hastings, M. L., E. Allemand, D. M. Duelli, M. P. Myers, and A R. Krainer, 2007 Control of pre-  
927 mRNA splicing by general splicing factors PUF60 and U2AF<sup>65</sup>. *PLoS One* 2: e538.
- 928 Henn, A., M. J. Bradley, and E. M. De La Cruz, 2012 ATP utilization and RNA conformational  
929 rearrangement by DEAD-box proteins. *Annu. Rev. Biophys.* 41: 247–267.
- 930 Herold, N., C. L. Wil, E. Wolf, B. Kastner, H. Urlaub *et al.*, 2009 Conservation of the protein  
931 composition and electron microscopy structure of *Drosophila melanogaster* and human  
932 spliceosomal complexes. *Mol. Cell. Biol.* 29: 281–301.
- 933 Hu, S., L. E. Skelly, E. Kaymak, L. Freeberg, T.-W. Lo *et al.*, 2019 Multi-modal regulation of *C.*  
934 *elegans* hermaphrodite spermatogenesis by the GLD-1-FOG-2 complex. *Dev. Biol.* 446: 193–  
935 205.
- 936 Irion, U., M. Leptin, K. Siller, S. Fuerstenberg, Y. Cai *et al.*, 2004 Abstrakt, a DEAD box protein,  
937 regulates Insc levels and asymmetric division of neural and mesodermal progenitors. *Current*  
938 *Biology* 14: 138–144.
- 939 Jiang, Y., Y. Zhu, Z.-J. Liu, and S. Ouyang, 2017 The emerging roles of the DDX41 protein in  
940 immunity and diseases. *Protein Cell* 8: 83–89.
- 941 Jiao, A. L., R. Perales, N. T. Umbreit, J. R. Haswell, M. E. Piper *et al.*, 2019 Human nuclear RNAi-  
942 defective 2 (NRDE2) is an essential RNA splicing factor. *RNA* 25: 352–3463.
- 943 Jones, A. R., and T. Schedl, 1995 Mutations in *gld-1*, a female germ cell-specific tumor suppressor  
944 gene in *Caenorhabditis elegans*, affects a conserved domain also found in Src-associated protein  
945 Sam68. *Genes Dev.* 9: 1491–1504.
- 946 Jurica, M. S., L. J. Licklider, S. P. Gygi, N. Grigorieff, and M. J. Moore, 2002 Purification and

- 947 characterization of native spliceosomes suitable for three-dimensional structural analysis. RNA  
948 8: 426–439.
- 949 Kamath, RS, A. G. Fraser, Y. Dong, G. Poulin, R. Durbin *et al.*, 2003 Systematic functional analysis of  
950 the *C. elegans* genome using RNAi. Nature 421: 231–237.
- 951 Kasturi, P., S. Zanetti, M. Passannante, Z. Saudan, F. Müller *et al.*, 2010 The *C. elegans* sex  
952 determination protein MOG-3 functions in meiosis and binds to the CSL co-repressor CIR-1.  
953 Dev. Biol. 344: 593–602.
- 954 Kao, H.-Y., and P. G. Siliciano, 1996 Identification of Prp40, a novel essential yeast splicing factor  
955 associated with the U1 small nuclear ribonucleoprotein particle. Mol. Cell. Biol. 16: 960–967.
- 956 Keikhaee, M. R., E. B. Nash, S. M. O'Rourke, and B. Bowerman, 2014 A semi-dominant mutation in  
957 the general splicing factor SF3a66 causes anterior-posterior axis reversal in one-cell stage *C.*  
958 *elegans* embryos. PLoS One 9: e106484.
- 959 Kerins, J. A., M. Hanazawa, M. Dorsett, and T. Schedl, 2010 PRP-17 and the pre-mRNA splicing  
960 pathway are preferentially required for the proliferation versus meiotic development decision  
961 and germline sex determination in *Caenorhabditis elegans*. Dev. Dyn. 239: 1555–1572.
- 962 Kim, S., J. A. Govindan, Z. J. Tu, and D. Greenstein, 2012 SACY-1 DEAD-Box helicase links the  
963 somatic control of oocyte meiotic maturation to the sperm-to-oocyte switch and gamete  
964 maintenance in *Caenorhabditis elegans*. Genetics 192: 905–928.
- 965 Kim, Y. J., and O. Abdel-Wahab, 2017 Therapeutic targeting of RNA splicing in myelodysplasia.  
966 Semin. Hematol. 54: 167–173.
- 967 Kosinski, M., K. McDonald, J. Schwartz, I. Yamamoto, and D. Greenstein, 2005 *C. elegans* sperm bud  
968 vesicles to deliver a meiotic maturation signal to distant oocytes. Development 132: 3357–  
969 3369.
- 970 Levy, A. D., J. Yang, and J. M. Kramer, 1993 Molecular and genetic analyses of the *Caenorhabditis*  
971 *elegans* *dpy-2* and *dpy-10* collagen genes: a variety of molecular alterations affect organismal

- 972 morphology. *Mol. Bio. Cell* 4: 803–817.
- 973 Lewinsohn, M., A. L. Brown, L. W. Weinel, C. Phung, G. Rafidi *et al.*, 2016 Novel germ line *DDX41*  
974 mutations define families with a lower age of MDS/AML onset and lymphoid malignancies.  
975 *Blood* 127: 1017–1023.
- 976 Li, R., N. Sobreira, P. D. Witmer, K. W. Pratz, and E. M. Braunstein, 2016 Two novel germline  
977 *DDX41* mutations in a family with inherited myelodysplasia/acute myeloid leukemia.  
978 *Hematologica* 101: e228–e231.
- 979 Li, X., S. Liu, J. Jiang, S. Espinosa, R. C. Hill *et al.*, 2017 CryoEM structure of *Saccharomyces*  
980 *cerevisiae* U1 snRNP offers insight into alternative splicing. *Nat. Commun.* 8: 1035.
- 981 Longman, D., I. L. Johnstone, and J. F. Cáceres, 2000 Functional characterization of SR and SR-  
982 related genes in *Caenorhabditis elegans*. *EMBO J.* 19: 1625–1637.
- 983 Maciejewski, J. P., R. A. Padgett, A. L. Brown, and C. Müller-Tidow, 2017 *DDX41*-related myeloid  
984 dysplasia. *Semin. Hematol.* 54: 94–97.
- 985 Maine, E. M., and J. Kimble, 1993 Suppressors of *glp-1*, a gene required for cell communication  
986 during development in *Caenorhabditis elegans*, define a set of interacting genes. *Genetics* 135:  
987 1011–1022.
- 988 Maita, H., H. Kitaura, H. Ariga, and S. M. Iguchi-Ariga, 2005 CIR, a corepressor of CBF, binds to  
989 PAP-1 and effects alternative splicing. *Exp. Cell Res.* 303: 375–387.
- 990 Mantina, P., L. McDonald, A. Kulaga, L. Zhao, and D. Hansen, 2009 A mutation in *teg-4*, which  
991 encodes a protein homologous to the SAP130 pre-mRNA splicing factor, disrupts the balance  
992 between proliferation and differentiation in the *C. elegans* germ line. *Mech. Dev.* 126: 417–  
993 429.
- 994 Nadarajan, S., J. A. Govindan, M. McGovern, E. J. Hubbard, and D. Greenstein, 2009 MSP and GLP-  
995 1/Notch signaling coordinately regulate actomyosin-dependent cytoplasmic streaming and  
996 oocyte growth in *C. elegans*. *Development* 136: 2223–2234.

- 997 Nishiwaki, K., and J. Miwa, 1998 Mutations in genes encoding extracellular matrix proteins suppress  
998 the *emb-5* gastrulation defect in *Caenorhabditis elegans*. *Mol. Gen. Genet.* 259: 2–12.
- 999 Novak, P., X. Wang, M. Ellenbecker, S. Feilzer, and E. Voronina, 2015 Splicing machinery facilitates  
1000 post-transcriptional regulation by FBFs and other RNA-binding proteins in the *Caenorhabditis*  
1001 *elegans* germline. *G3* 5: 2051–2059.
- 1002 Omura, H., D. Oikawa, T. Nakane, M. Kato, R. Ishii *et al.*, 2016 Structural and functional analysis of  
1003 DDX41: a bispecific immune receptor for DNA and cyclic dinucleotide. *Sci. Rep.* 6: 34756.
- 1004 Ortiz, M. A., D. Noble, E. P. Sorokin, and J. Kimble, 2014 A new dataset of spermatogenic vs. oogenic  
1005 transcriptomes in the nematode *Caenorhabditis elegans*. *G3* 4: 1765–1772.
- 1006 Page-McCaw, P. S., K. Amonlirdviman, and P. A. Sharp, 1999 PUF60: a novel U2AF65-related  
1007 splicing activity. *RNA* 5: 1548–1560.
- 1008 Paix, A., Y. Wang, H. E. Smith, C. Y. Lee, D. Calidas *et al.*, 2014 Scalable and versatile genome  
1009 editing using linear DNAs with microhomology to Cas9 sites in *Caenorhabditis elegans*.  
1010 *Genetics* 198: 1347–1356.
- 1011 Papaemmanuil, E., M. Gerstung, L. Bullinger, V. I. Gaidzik, P. Paschka *et al.*, 2016 Genomic  
1012 classification and prognosis in acute myeloid leukemia. *N. Engl. J. Med.* 374: 2209–2221.
- 1013 Parvatiyar, K., Z. Zhang, R. M. Teles, S. Ouyang, Y. Jiang *et al.*, 2012. The helicase DDX41  
1014 recognizes the bacterial secondary messengers cyclic di-GMP and cyclic di-AMP to activate a  
1015 type I interferon immune response. *Nature Immunology* 13: 1155–1161.
- 1016 Pepper, A. S.-R., D. J. Killian, and E. J. A. Hubbard, 2003 Genetic analysis of *Caenorhabditis elegans*  
1017 *glp-1* mutants suggests receptor interaction or competition. *Genetics* 163: 115–132.
- 1018 Perry, M. D., W. Li, C. Trent, B. Robertson, A. Fire *et al.*, 1993 Molecular characterization of the *her-*  
1019 *1* gene suggests a direct role in cell signaling during *Caenorhabditis elegans* sex determination.  
1020 *Genes Dev.* 7: 216–228.

- 1021 Peters, D., C. Radine, A. Reese, W. Budach, D. Sohn, and R. U. Jänicke, 2017 The DEAD-box RNA  
1022 helicase DDX41 is a novel repressor of p21<sup>WAF1/CIP1</sup> mRNA translation. *J. Biol. Chem.* 292:  
1023 8331–8341.
- 1024 Polprasert, C., I. Schulze, M. A. Sekeres, H. Makishima, B. Przychodzen *et al.*, 2015 Inherited and  
1025 somatic defects in DDX41 in myeloid neoplasms. *Cancer Cell* 27: 658–670.
- 1026 Puoti, A., and J. Kimble, 1999 The *Caenorhabditis elegans* sex determination gene *mog-1* encodes a  
1027 member of the DEAH-Box protein family. *Mol. Cell Biol.* 19: 2189–2197.
- 1028 Puoti, A., and J. Kimble, 2000 The hermaphrodite sperm/oocyte switch requires the *Caenorhabditis*  
1029 *elegans* homologs of PRP2 and PRP22. *Proc. Natl. Acad. Sci. USA* 97: 3276–3281.
- 1030 Rodrigues, F., L. Thuma, and C. Klämbt, 2012 The regulation of glial-specific splicing of Neurexin IV  
1031 requires HOW and Cdk12 activity. *Development* 139: 1765–1776.
- 1032 Rose, K. L., V. P. Winfrey, L. H. Hoffman, D. H. Hall, T. Furuta *et al.*, 1997 The POU gene *ceh-18*  
1033 promotes gonadal sheath cell differentiation and function required for meiotic maturation and  
1034 ovulation in *Caenorhabditis elegans*. *Dev. Biol.* 192: 59–77.
- 1035 Rual, J. F., N. Klitgord, and G. Achaz 2007 Novel insights into RNAi off-target effects using *C.*  
1036 *elegans* paralogs. *BMC Genomics* 8: 106.
- 1037 Sam, M., W. Wurst, M. Klüppel, O. Jin, H. Heng *et al.*, 1998 *Aquarius*, a novel gene isolated by gene  
1038 trapping with an RNA-dependent RNA polymerase motif. *Dev. Dyn.* 212: 304–317.
- 1039 Sanchez, P., K. J. Daniels, Y. N. Park, and D. R. Soll 2014 Generating a battery of monoclonal  
1040 antibodies against native green fluorescent protein for immunostaining, FACS, IP, and ChIP  
1041 using a unique adjuvant. *Monoclon Antib Immunodiagn Immunother.* 33: 80–88.
- 1042 Schedl, T., and J. Kimble, 1988 *fog-2*, a germ-line-specific sex determination gene required for  
1043 hermaphrodite spermatogenesis in *Caenorhabditis elegans*. *Genetics* 119: 43–61.
- 1044 Schneider, M., H.-H. Hsiao, C. L. Will, R. Giet, H. Urlaub *et al.*, 2010 Human PRP4 kinase is required  
1045 for stable tri-snRNP association during spliceosomal B complex formation. *Nat. Struct. Mol.*

- 1046 Biol. 17: 216–221.
- 1047 Schütz, P., T. Karlberg, S. van den Berg, R. Collins, L. Lehtiö *et al.*, 2010 Comparative structural  
1048 analysis of human DEAD-box RNA helicases. PLoS One 5: e12791.
- 1049 Sébert, M., M. Passet, A. Raimbault, R. Rahmé, E. Raffoux *et al.*, 2019 Germline *DDX41* mutations  
1050 define a significant entity within adult MDS/AML patients. Blood 134: 1441–1444.
- 1051 Seiler, M., A. Yoshimi, R. Darman, B. Chan, G. Keaney *et al.*, 2018 H3B-8800, an orally available  
1052 small-molecule splicing modulator, induces lethality in spliceosome-mutant cancers. Nat. Med.  
1053 24: 487–504.
- 1054 Serrat, X., D. Kukhtar, E. Cornes, A. Esteve-Codina, H. Benlloch *et al.*, 2019 CRISPR editing of *sftb-*  
1055 *1/SF3B1* in *Caenorhabditis elegans* allows the identification of synthetic interactions with  
1056 cancer-related mutations and the chemical inhibition of splicing. PLoS Genetics 15: e1008464.
- 1057 Spike, C. A., D. Coetzee, C. Eichten, X. Wang, D. Hansen *et al.*, 2014a The TRIM-NHL protein LIN-  
1058 41 and the OMA RNA-binding proteins antagonistically control the prophase-to-metaphase  
1059 transition and growth of *Caenorhabditis elegans* oocytes. Genetics 198: 1535–1558.
- 1060 Spike, C. A., D. Coetzee, Y. Nishi, T. Guven-Ozkan, M. Oldenbroek *et al.*, 2014b Translational  
1061 control of the oogenic program by components of OMA ribonucleoprotein particles in  
1062 *Caenorhabditis elegans*. Genetics 198: 1513–1533.
- 1063 Stavrou, S., A. N. Aguilera, K. Blouch, and S. R. Ross, 2018 DDX41 recognizes RNA/DNA retroviral  
1064 reverse transcripts and is critical for in vivo control of murine leukemia virus infection. MBio  
1065 9: e00923–18.
- 1066 Stavrou, S., K. Blouch, S. Kotla, A. Bass, and S. R. Ross, 2015 Nucleic acid recognition orchestrates  
1067 the anti-viral response to retroviruses. Cell Host Microbe 17: 478–488.
- 1068 Sun, L., J. Wu, F. Du, X. Chen, and Z. J. Chen, 2013 Cyclic GMP-AMP synthase is a cytosolic DNA  
1069 sensor that activates the type I interferon pathway. Science 339: 786–791.
- 1070 Tefferi, A., and J. W. Vardiman, 2009 Myelodysplastic syndromes. N. Engl. J. Med. 361: 1872–1885.



- 1071 Timmons, L., and A. Fire, 1998 Specific interference by ingested dsRNA. *Nature* 395: 854.
- 1072 Tsukamoto, T., M. D. Gearhart, C. A. Spike, G. Huelgas-Morales, M. Mews *et al.*, 2017 LIN-41 and  
1073 OMA ribonucleoprotein complexes mediate a translational repression-to-activation switch  
1074 controlling oocyte meiotic maturation and the oocyte-to-embryo transition in *Caenorhabditis*  
1075 *elegans*. *Genetics* 206: 2007–2039.
- 1076 Van Buskirk, C., and T. Schüpbach, 2002 *half pint* regulates alternative splice site selection in  
1077 *Drosophila*. *Developmental Cell* 2: 343–353.
- 1078 Wahl, M. C., C. L. Will, and R. Lührmann, 2009 The spliceosome: design principles of a dynamic  
1079 RNP machine. *Cell* 136: 701–718.
- 1080 Wang, C., L. Wilson-Berry, T. Schedl, and D. Hansen, 2012 TEG-1 CD2BP2 regulates stem cell  
1081 proliferation and sex determination in the *C. elegans* germ line and physically interacts with the  
1082 UAF-1 U2AF65 splicing factor. *Dev. Dyn* 241: 505–521.
- 1083 Will, C. L., H. Urlaub, T. Achsel, M. Gentzel, M. Wilm *et al.*, 2002 Characterization of a novel SF3b  
1084 and 17S U2 snRNP proteins, including a human Prp5p homologue and an SF3b DEAD-box  
1085 protein. *EMBO J.* 18: 4978–4988.
- 1086 Yoshida, K., M. Sanada, Y. Shiraishi, D. Nowak, Y. Nagata *et al.*, 2011 Frequent pathway mutations  
1087 of splicing machinery in myelodysplasia. *Nature* 478: 64–69.
- 1088 Yoshida, K., and S. Ogawa, 2014 Splicing factor mutations and cancer. *WIREs RNA* 5: 445–459.
- 1089 Yoshimi, A., K.-T. Lin, D. H. Wiseman, M. A. Rahman, A. Pastore *et al.*, 2019 Coordinated  
1090 alterations in RNA splicing and epigenetic regulation drive leukaemogenesis. *Nature* 574: 273–  
1091 277.
- 1092 Zanetti, S., and A. Puoti, 2013 Sex determination in the *Caenorhabditis elegans* germline. *Adv. Exp.*  
1093 *Med. Biol.* 757: 41–69.
- 1094 Zanetti, S., M. Meola, A. Bochud, and A. Puoti, 2011 Role of the *C. elegans* U2 snRNP protein MOG-  
1095 2 in sex determination, meiosis, and splice site selection. *Dev. Biol.* 354: 232–241.

- 1096 Zhang, L., J. D. Ward, Z. Cheng, and A. F. Dernburg, 2015 The auxin-inducible degradation (AID)  
1097 system enables versatile conditional protein depletion in *C. elegans*. *Development* 142: 4374–  
1098 4384.
- 1099 Zhang, X., C. Yan, J. Hang, L. I. Finci, J. Lei *et al.*, 2017 An atomic structure of the human  
1100 spliceosome. *Cell* 169: 918–928.
- 1101 Zhang, Z., B. Yuan, M. Bao, N. Lu, T. Kim *et al.*, 2011 The helicase DDX41 senses intracellular DNA  
1102 mediated by the adaptor STING in dendritic cells. *Nature Immunol.* 12: 959–965.

1103 **Table 1 RNAi of *sacy-1* enhancer loci increase the penetrance of germline or lethal**  
 1104 **phenotypes in *sacy-1(tn1385)* reduction-of-function mutants**  
 1105

| RNAi <sup>a</sup>                    | Genotype              | Sterile (%) <sup>b</sup> | Gamete degeneration <sup>b</sup> (%) | Embryonic lethal (%) <sup>c</sup> |
|--------------------------------------|-----------------------|--------------------------|--------------------------------------|-----------------------------------|
| L4440 (control)                      | Wild type             | 0<br>(n=338)             | 0<br>(n=338)                         | 1<br>(n=674)                      |
|                                      | <i>sacy-1(tn1385)</i> | 0<br>(n=256)             | 0<br>(n=256)                         | 1<br>(n=502)                      |
| <i>mog-2</i> (II-3D16)               | Wild type             | 4<br>(n=172)             | 0<br>(n=54)                          | 7<br>(n=574)                      |
|                                      | <i>sacy-1(tn1385)</i> | 43<br>(n=254)            | 47<br>(n=72)                         | 95<br>(n=426)                     |
| <i>Y111B2A.25</i><br>(III-6G22)      | Wild type             | 22<br>(n=230)            | 1<br>(n=94)                          | 84<br>(n=463)                     |
|                                      | <i>sacy-1(tn1385)</i> | 95<br>(n=272)            | 16<br>(n=110)                        | 93<br>(n=42)                      |
| <i>cacn-1</i> <sup>d</sup> (II-9E09) | Wild type             | 100<br>(n=164)           | 35<br>(n=40)                         | ND                                |
|                                      | <i>sacy-1(tn1385)</i> | 100<br>(n=224)           | 81<br>(n=52)                         | ND                                |
| <i>emb-4</i> (V-12E12)               | Wild type             | 2<br>(n=184)             | 0<br>(n=110)                         | 12<br>(n=337)                     |
|                                      | <i>sacy-1(tn1385)</i> | 89<br>(n=176)            | 42<br>(n=82)                         | N.D.                              |
| <i>emb-4</i> (V-12E14)               | Wild type             | 4<br>(n=288)             | 0<br>(n=96)                          | 13<br>(n=421)                     |
|                                      | <i>sacy-1(tn1385)</i> | 91<br>(n=202)            | 80<br>(n=120)                        | ND                                |
| <i>emb-4</i> (V-12E16)               | Wild type             | 4<br>(n=210)             | 0<br>(n=96)                          | 9<br>(n=433)                      |
|                                      | <i>sacy-1(tn1385)</i> | 91<br>(n=326)            | 87<br>(n=140)                        | ND                                |

1106 <sup>a</sup>RNAi clones showing genetic interactions with *sacy-1* are listed with the target gene name in  
 1107 italics and the location of the clone in the RNAi library in parentheses. The identity of clones was  
 1108 verified by DNA sequencing.

1109 <sup>b</sup>Sterility and gamete degeneration were scored by DIC microscopy on the first day of adulthood  
 1110 24 hours post-L4 at 22°C. Gonad arms were scored as sterile if they did not produce embryos and  
 1111 exhibited defects in gametogenesis. Number of gonad arms scored is reported.

1112 <sup>c</sup>Embryonic lethality was measured by conducting daily egg lays over the reproductive lifespan  
1113 and determining the number of embryos that failed to hatch by 48 hours after egg laying. The  
1114 number of embryos scored is reported.  
1115 <sup>d</sup>*cacn-1* was not initially identified as an enhancer of *sacy-1* during the genome-wide RNAi screen  
1116 because *cacn-1(RNAi)* results in complete sterility in both *sacy-1(tn1385)* and wild-type animals.  
1117 However, we determined that RNAi to the *Y111B2A.25* pseudogene likely targets *cacn-1* (see text  
1118 for details).  
1119 ND, not determined.

1120 **Table 2 Genetic interactions between *sacy-1* and *emb-4***

1121

1122 **A. Enhancement of germline and somatic *sacy-1* mutant defects**

| Genotype                                                  | Vulval rupture (%) | Sterile and Pvl <sup>a</sup> (%) | Sterile <sup>a</sup> (%) | Fertile (%)     |
|-----------------------------------------------------------|--------------------|----------------------------------|--------------------------|-----------------|
| <i>sacy-1(tm5503)</i> (n=284)                             | 3                  | 1                                | 96                       | 0               |
| <i>sacy-1(tm5503)/+; emb-4(sa44)</i> <sup>b</sup> (n=205) | 0                  | 0                                | 0                        | 100             |
| <i>sacy-1(tm5503); emb-4(sa44)</i> <sup>b</sup> (n=242)   | 83                 | 16                               | 1                        | 0               |
| <i>sacy-1(tn1385)</i> (n=278)                             | 0                  | 0                                | 0                        | 100             |
| <i>sacy-1(tn1385)/+; emb-4(sa44)</i> <sup>b</sup> (n=201) | 0                  | 0                                | 0                        | 100             |
| <i>sacy-1(tn1385); emb-4(sa44)</i> <sup>b,c</sup> (n=144) | 36                 | 4                                | 3                        | 57 <sup>d</sup> |

1123 <sup>a</sup>Sterile animals exhibit the *sacy-1(lf)* gamete degeneration phenotype.

1124 <sup>b</sup>The *hT2(qIs48)* balancer chromosome, which is dominantly marked with GFP, was used to differentiate between *sacy-1(tm5503)* heterozygotes and homozygotes.

1125 <sup>c</sup>The progeny of *sacy-1(tn1385)/hT2(qIs48); emb-4(sa44)* hermaphrodites; the balancer chromosome provides maternal *sacy-1(+)* function. The fertile F1 progeny of these animals are maternal-effect lethal, see Table 2B, below.

1126 <sup>d</sup>These adult hermaphrodites produce a majority of embryos that fail to hatch, see Table 2B.

1127

1128 **B. Enhancement of embryonic lethality**

| Genotype <sup>a</sup>                                   | Embryonic lethal (%) | L1 lethal (%) | Viable (%) |
|---------------------------------------------------------|----------------------|---------------|------------|
| <i>sacy-1(tn1385)</i> (n=949)                           | 1                    | 0             | 99         |
| <i>emb-4(sa44)</i> (n=1348)                             | 4                    | 0             | 96         |
| <i>sacy-1(tn1385); emb-4(sa44)</i> <sup>b</sup> (n=620) | 97                   | 3             | 0          |

1129 <sup>a</sup>The number of embryos examined.

1130 <sup>b</sup>The F1 progeny of fertile *sacy-1(tn1385); emb-4(sa44)* parents derived from the *sacy-1(tn1385)/+; emb-4(sa44)* heterozygotes analyzed in Table 2A above.

1131

1135 **Table 3. Spliceosomal proteins associated with SACY-1 using tandem affinity**  
 1136 **purification**

|                       |                                                                       | Protein Coverage (%) <sup>a</sup>              |                                                       |
|-----------------------|-----------------------------------------------------------------------|------------------------------------------------|-------------------------------------------------------|
|                       |                                                                       | Experiment I                                   | Experiment II                                         |
| Protein               |                                                                       | Tandem IP<br>female<br>background <sup>b</sup> | Tandem IP<br>hermaphrodite<br>background <sup>b</sup> |
| SACY-1                | DDX41/Abstrakt/recruited to C-complex                                 | 78.9                                           | 76.5                                                  |
| Spliceosomal proteins | Human protein/Spliceosome subcomplex                                  |                                                |                                                       |
| PRP-19                | PRP19hPRP19/CDC5L complex <sup>c</sup>                                | 62.0                                           | 55.5                                                  |
| MOG-2 <sup>d</sup>    | U2A'/17S U2 snRNP <sup>c</sup>                                        | 56.1                                           | 42.3                                                  |
| SKP-1                 | SNW1/SKIP/hPRP19/CDC5L-related complex                                | 52.9                                           | 40.9                                                  |
| EMB-4, isoform b      | Aquarius/KIAA0560/Intron-binding complex RNA helicase <sup>c, e</sup> | 50.4                                           | 30.6                                                  |
| PRP-17                | hPRP17/WD40-domain step 2 factor <sup>c, f</sup>                      | 48.3                                           | 33.7                                                  |
| CYN-13                | Cyclophilin E/PPIE/Intron-binding                                     | 46.8                                           | 37.8                                                  |

|                     |                                                                      |      |      |
|---------------------|----------------------------------------------------------------------|------|------|
|                     | complex <sup>e</sup>                                                 |      |      |
| CDC-5L              | CDC5L/hPRP19/CDC5L complex <sup>c</sup>                              | 45.8 | 26.2 |
| Y69A2AR.21          | CCDC12/Recruited to B-complex <sup>c</sup>                           | 45.6 | 52.1 |
| RBM-22              | RBM22/ hPRP19/CDC5L-related complex <sup>c, g</sup>                  | 45.1 | 43.9 |
| EFTU-2 <sup>d</sup> | U5 116K <sup>c</sup>                                                 | 45.1 | 37.2 |
| ISY-1               | hIsy1/Intron-binding complex <sup>e</sup>                            | 40.8 | 34.8 |
| PLRG-1              | PLRG1/PRL1/hPRP19/CDC5L complex <sup>c</sup>                         | 39.1 | 27.3 |
| RBMX-2 <sup>d</sup> | CGI-79/SNU17/IST3/hRes complex <sup>c</sup>                          | 38.7 | 20.9 |
| CYN-10              | PPIL3b/peptidyl-prolyl isomerase recruited to C-complex <sup>c</sup> | 37.9 | 23.6 |
| RBM-25              | RBM25/affects alternative splicing/putative U1 snRNP component       | 37.5 | 25.8 |
| RNP-6, isoform a    | PUF60/U2AF65-related promotes alternative splicing <sup>h</sup>      | 37.2 | 49.3 |
| SYF-2               | GCIP p29/SYF2/Recruited to C-complex <sup>c</sup>                    | 37.2 | 29.9 |

|                     |                                                                       |      |      |
|---------------------|-----------------------------------------------------------------------|------|------|
| PRP-8               | PRPF8/PRP8/U5 220K <sup>i</sup>                                       | 37.0 | 29.4 |
| EMB-4, isoform a    | Aquarius/KIAA0560/Intron-binding complex RNA helicase <sup>c, d</sup> | 36.8 | 28.6 |
| DDX-35              | DDX35/DHX35/Recruited to C-complex <sup>c</sup>                       | 36.8 | 19.8 |
| SNRP-40.1           | snRNP40/U5 40K <sup>c</sup>                                           | 36.6 | 27.5 |
| RBM-39 <sup>d</sup> | RBM39/protein recruited to A-complex <sup>c</sup>                     | 35.9 | 31.0 |
| CACN-1              | Cactin/C-complex <sup>c, j</sup>                                      | 35.9 | 13.4 |
| ACIN-1              | Acinus/Exon junction complex <sup>c</sup>                             | 35.2 | 13.1 |
| M03F8.3             | hSYF3/CRNKL1/hPRP19/CDC5L-related protein                             | 35.0 | 24.3 |
| ZK1098.1            | PRP40/FBP11 <sup>k</sup>                                              | 34.5 | 28.7 |
| C50D2.5             | SF3b14/SF3b6/17S U2 snRNP protein                                     | 33.3 | 8.7  |
| SYF-1               | hSyf1/Xab2/Intron-binding complex <sup>e</sup>                        | 32.4 | 28.0 |
| EMB-4, isoform e    | Aquarius/KIAA0560/Intron-binding complex RNA helicase <sup>c, e</sup> | 31.7 | 18.4 |
| F33D11.10           | EIF4A3/ Exon junction complex <sup>c</sup>                            | 31.3 | 17.0 |



|                  |                                                                           |      |      |
|------------------|---------------------------------------------------------------------------|------|------|
| REPO-1           | SF3a66/SF3A2/17S U2 snRNP<br>protein <sup>c,1</sup>                       | 30.6 | 5.9  |
| Y54G2A.12        | hPRP17/hCDC40/Step 2 factor                                               | 29.9 | 27.7 |
| PNN-1            | Pinin/Exon junction complex <sup>c</sup>                                  | 28.7 | 20.3 |
| BCAS-2           | Spf27/BCAS2/hPRP19/CDC5L<br>complex <sup>c</sup>                          | 28.6 | 20.2 |
| EMB-4, isoform d | Aquarius/KIAA0560/Intron-<br>binding complex RNA helicase <sup>c, e</sup> | 28.3 | 27.9 |
| RSP-7            | p54 SR protein <sup>m</sup>                                               | 27.2 | 27.4 |
| CWC-15           | CCAP2/CWC15/hPRP19/CDC5L<br>complex <sup>c</sup>                          | 27.0 | 22.6 |
| LET-858          | KIAA1604/CWC22/Recruited to<br>B-complex <sup>c</sup>                     | 26.5 | 16.5 |
| R07E5.1          | GPATCH1/ECGP <sup>n</sup>                                                 | 26.0 | 11.2 |
| RSR-2            | SRm300/SRRM2                                                              | 24.0 | 21.2 |
| MOG-3            | CCDC49/CWC25/recruited to C-<br>complex <sup>o</sup>                      | 21.3 | 20.0 |
| CYN-12           | PPIL1/ peptidyl-prolyl<br>isomerase/hPrp19/CDC5L-related<br>protein       | 20.1 | 20.1 |

|                       |                                                                    |      |      |
|-----------------------|--------------------------------------------------------------------|------|------|
| F25B4.5               | PRPF39/PRP39/U1 snRNP<br>auxiliary protein <sup>p</sup>            | 20.1 | 10.0 |
| SNRP-40.2             | U5 snRNP 40K <sup>c</sup>                                          | 19.6 | 16.0 |
| C16C10.4              | SAP18/Exon junction complex <sup>c</sup>                           | 17.5 | 7.8  |
| DDX-23                | U5 snRNP 100K/PRP28 <sup>c</sup>                                   | 17.1 | 7.5  |
| R08D7.1               | BUD13/hRes complex <sup>c</sup>                                    | 16.6 | 3.7  |
| TEG-4                 | SF3b130/SF3B3/17S U2 snRNP <sup>c</sup>                            | 14.9 | 8.8  |
| SFTB-1 <sup>s</sup>   | SF3b155/SF3B1/17S U2 snRNP <sup>c</sup>                            | 14.7 | 1.2  |
| F53H1.1, isoform a    | SF3b125/17S U2 snRNP <sup>q</sup>                                  | 14.5 | 3.4  |
| RNP-6, isoform b      | PUF60/U2AF65-related promotes<br>alternative splicing <sup>h</sup> | 13.6 | 20.3 |
| PRPF-4, isoform a     | PRP4 kinase <sup>r</sup>                                           | 12.5 | 7.1  |
| RNP-3                 | U2B''/17S U2 snRNP <sup>c</sup>                                    | 12.4 | 12.4 |
| F53H1.1, isoform e    | SF3b125/17S U2 snRNP <sup>q</sup>                                  | 11.9 | 5.1  |
| PRP-21                | SF3a120/SF3A1/PRP21/17S U2<br>snRNP protein <sup>c</sup>           | 11.8 | 7.0  |
| SNRP-200 <sup>d</sup> | U5 200K <sup>c</sup>                                               | 11.1 | 7.7  |
| SFTB-2                | SF3b145/SF3B2/17S U2 snRNP <sup>c</sup>                            | 10.1 | 1.5  |

RNP-5

RNPS1/EJC<sup>c</sup>

10.0

18.0

---

1137 <sup>a</sup>Peptide coverage in a single gel slice assessed by mass spectrometry in the various SACY-1  
1138 purifications from DG4068 *sacy-1(tn1632[3x flag::PreScission::gfp::tev::s::sacy-1]) fog-1(q253)*  
1139 extract and DG4070 *sacy-1(tn1632)* extract. Only proteins showing at least 10% coverage in the  
1140 tandem immunopurification (IP) from the high-speed supernatant are shown. The complete  
1141 data on which Table 3 is based, including filtering criteria, are presented in File S1.

1142 <sup>b</sup>Experiments I and II utilized 515 mg and 280 mg total protein, respectively, from a high-speed  
1143 supernatant for tandem IP.

1144 <sup>c</sup>Bessonov *et al.* 2008.

1145 <sup>d</sup>MOG-2, EFTU-2, RBMX-2, RBM-39, SFTB-1, TEG-4 and SNRP-200 are reported in Table 3 and  
1146 not filtered out despite their low representation (14.2%, 4.4%, 3.6%, 6.9%, 2.0%, 1.1% and 4.5%  
1147 coverage, respectively) in the LIN-41 tandem IP from high-speed supernatant (Tsukamoto *et al.*  
1148 2017) because they were reported as splicing factors. F33D11.10 is reported in Table 3 despite  
1149 its low representation (10.3% coverage) in the OOC-5 tandem IP from high-speed supernatant  
1150 (unpublished data) because it was reported as a splicing factor.

1151 <sup>e</sup>De *et al.* 2015; Haselbach *et al.* 2018.

1152 <sup>f</sup>Bertram *et al.* 2017.

1153 <sup>g</sup>Zhang *et al.* 2017.

1154 <sup>h</sup>Page-McCaw *et al.* 1999; Van Buskirk and Schüpbach 2002; Hastings *et al.* 2007.

1155 <sup>i</sup>Grainger and Beggs 2005.

1156 Fica *et al.* 2019.

1157 <sup>k</sup>Kao and Siliciano 1996.

1158 <sup>l</sup>Keikhaee *et al.* 2014.

1159 <sup>m</sup>Chaudhary *et al.* 1991; Longman *et al.* 2000.

1160 <sup>n</sup>Bessonov *et al.* 2010.

1161 <sup>o</sup>Fabrizio *et al.* 2009.

1162 <sup>p</sup>Li *et al.* 2017.

1163 <sup>q</sup>Will *et al.* 2002.

1164 <sup>r</sup>Schneider *et al.* 2010.

1165 **Table 4 *sacy-1(tn1385rf)* enhances the *glp-1(ar202)* Tumorous phenotype**

| Strain                                     | Gonad arms containing mitotic undifferentiated germ cells in the proximal gonad arm <sup>a</sup> |
|--------------------------------------------|--------------------------------------------------------------------------------------------------|
| <i>sacy-1(tn1385[G533R])</i>               | 0 (n=256) <sup>b</sup>                                                                           |
| <i>glp-1(ar202)</i>                        | 0.8 (n=364) <sup>b</sup>                                                                         |
| <i>sacy-1(tn1385[G533R]); glp-1(ar202)</i> | 49.6 (n=415) <sup>b</sup>                                                                        |
| <i>sacy-1(tn1887[R534H]); glp-1(ar202)</i> | 0 (n=62)                                                                                         |

1166 <sup>a</sup>The percentage of young adult hermaphrodites were examined by DIC microscopy approximately 40  
1167 hours post-L4 at 15°C. The number of gonad arms scored is listed.

1168 <sup>b</sup>In addition, dissected and fixed gonad from the same stage were stained for the phosphohistone  
1169 H3(Ser10) M-phase marker. Of 25 *sacy-1(tn1385); glp-1(ar202)* gonads scored, 16 (64%) contained  
1170 phosphohistone H3-positive undifferentiated germ cells in the proximal gonad arm. The average  
1171 number of proximal phosphohistone H3-positive germ cells in the Tumorous gonads was 22 ± 12.  
1172 None of the *sacy-1(tn1385)* (n=18) or *glp-1(ar202)* (n=31) dissected gonads examined contained  
1173 phosphohistone H3-positive undifferentiated germ cells in the proximal gonad arm.

1174 **Table 5 *sacy-1* alleles relevant to this study**

| Allele                             | Alteration      | Phenotypes                                                                               | Inferred activity                           |
|------------------------------------|-----------------|------------------------------------------------------------------------------------------|---------------------------------------------|
| Loss-of-function alleles           |                 |                                                                                          |                                             |
| <i>sacy-1(tm5503)</i> <sup>a</sup> | 619 bp deletion | Sterile, gamete degeneration                                                             | Likely null                                 |
| <i>sacy-1(tm1615)</i> <sup>b</sup> | 10 bp deletion  | Sterile, gamete degeneration                                                             | Likely null                                 |
| <i>sacy-1(tm1385)</i> <sup>a</sup> | G533R           | Viable and fertile, suppresses <i>acy-4</i> sterility, suppresses <i>fog-2</i> sterility | Reduction of function                       |
| <i>sacy-1(tm1391)</i> <sup>a</sup> | G473R           | Viable and fertile, suppresses <i>acy-4</i> sterility, suppresses <i>fog-2</i> sterility | Reduction of function                       |
| <i>sacy-1(tm1440)</i> <sup>a</sup> | G331R           | Viable and fertile, suppresses <i>acy-4</i> sterility, suppresses <i>fog-2</i> sterility | Reduction of function                       |
| <i>sacy-1(tm1482)</i> <sup>b</sup> | D506N           | Viable and fertile, suppresses <i>fog-2</i> sterility <sup>c</sup>                       | Reduction of function                       |
| <i>sacy-1(tm1483)</i> <sup>b</sup> | G269E           | Viable and fertile, suppresses <i>fog-2</i> sterility <sup>c</sup>                       | Reduction of function                       |
| Alleles with antagonistic activity |                 |                                                                                          |                                             |
| <i>sacy-1(tm1479)</i> <sup>b</sup> | G504E           | Sterile, adult lethal (rupture) or gamete degeneration                                   | <i>sacy-1(tm1479)</i> <sup>b</sup>          |
| <i>sacy-1(tm1480)</i> <sup>b</sup> | H527Y           | Viable and fertile at 20°C and suppresses <i>fog-2</i>                                   | Loss of function with antimorphic activity, |

|                                    |       |                                                                    |                                                                                          |
|------------------------------------|-------|--------------------------------------------------------------------|------------------------------------------------------------------------------------------|
|                                    |       | sterility. <sup>c</sup> Embryonic lethal or larval arrest at 15°C. | dominant Him                                                                             |
|                                    |       | Sterile and spermatogenesis-defective at 25°C                      |                                                                                          |
| <i>sacy-1(tn1481)</i> <sup>b</sup> | P222L | Sterile, masculinization of germline                               | Recessive gain-of-function<br>Loss of function with antimorphic activity                 |
| <i>sacy-1(tn1887)</i> <sup>b</sup> | R534H | Viable and fertile.                                                | Weak antagonistic activity; enhances the dominant Him phenotype of <i>sacy-1(tn1480)</i> |

---

1175 <sup>a</sup>Kim *et al.* 2012.

1176 <sup>b</sup>This work.

1177 <sup>c</sup>Suppression of *acy-4* sterility was not tested.

1178 **Table 6 *sacy-1* mutant alleles with antagonistic activity**

| Allele                                       | Class                                                   | Gamete<br>Degeneration <sup>a</sup> | Vulval<br>Rupture <sup>a</sup> | Mog <sup>a,b</sup> | T <sup>c</sup> |
|----------------------------------------------|---------------------------------------------------------|-------------------------------------|--------------------------------|--------------------|----------------|
| <i>sacy-1(tm5503)</i><br>(n=143)             | Strong loss-of-function                                 | 5.6                                 | 94.4                           | 0                  | 15             |
| <i>sacy-1(tm5503)</i><br>(n=96)              | Strong loss-of-function                                 | 96.9                                | 3.1                            | 0                  | 20             |
| <i>sacy-1(tm5503)</i><br>(n=106)             | Strong loss-of-function<br>(from <i>tm5503/+</i> )      | 98.0                                | 2.0                            | 0                  | 25             |
| <i>sacy-1(tm5503)<sup>d</sup></i><br>(n=231) | Strong loss-of-function<br>(from <i>tm5503/tn1480</i> ) | 14.7                                | 85.3                           | 0                  | 25             |
| <i>sacy-1(tn1615)</i><br>(n=92)              | Strong loss-of-function                                 | 97.8                                | 2.2                            | 0                  | 20             |
| <i>sacy-1(tn1479)</i><br>(n=170)             | Strong loss-of-function with<br>antagonistic activity   | 11.2                                | 88.8                           | 0                  | 20             |
| <i>sacy-1(tn1481)</i><br>(n=125)             | Recessive gain-of-function                              | 0                                   | 0                              | 100                | 20             |

1179 <sup>a</sup>The percentage of adult hermaphrodites exhibiting the reported phenotype is shown. Adults were  
1180 scored 24 hr post-L4 at 20° or 25°C or 48 hr post-L4 at 15°C.

1181 <sup>b</sup>*sacy-1(tn1481)* adult hermaphrodites produce large numbers of sperm but no oocytes and are sterile.

1182 <sup>c</sup>Growth temperature in °C.

1183 <sup>d</sup>The *sacy-1(tm5503)* progeny of *sacy-1(tm5503)/unc-13(e1091) sacy-1(tn1480)* hermaphrodites grown  
1184 at 25°C.



1185

## LEGENDS TO FIGURES

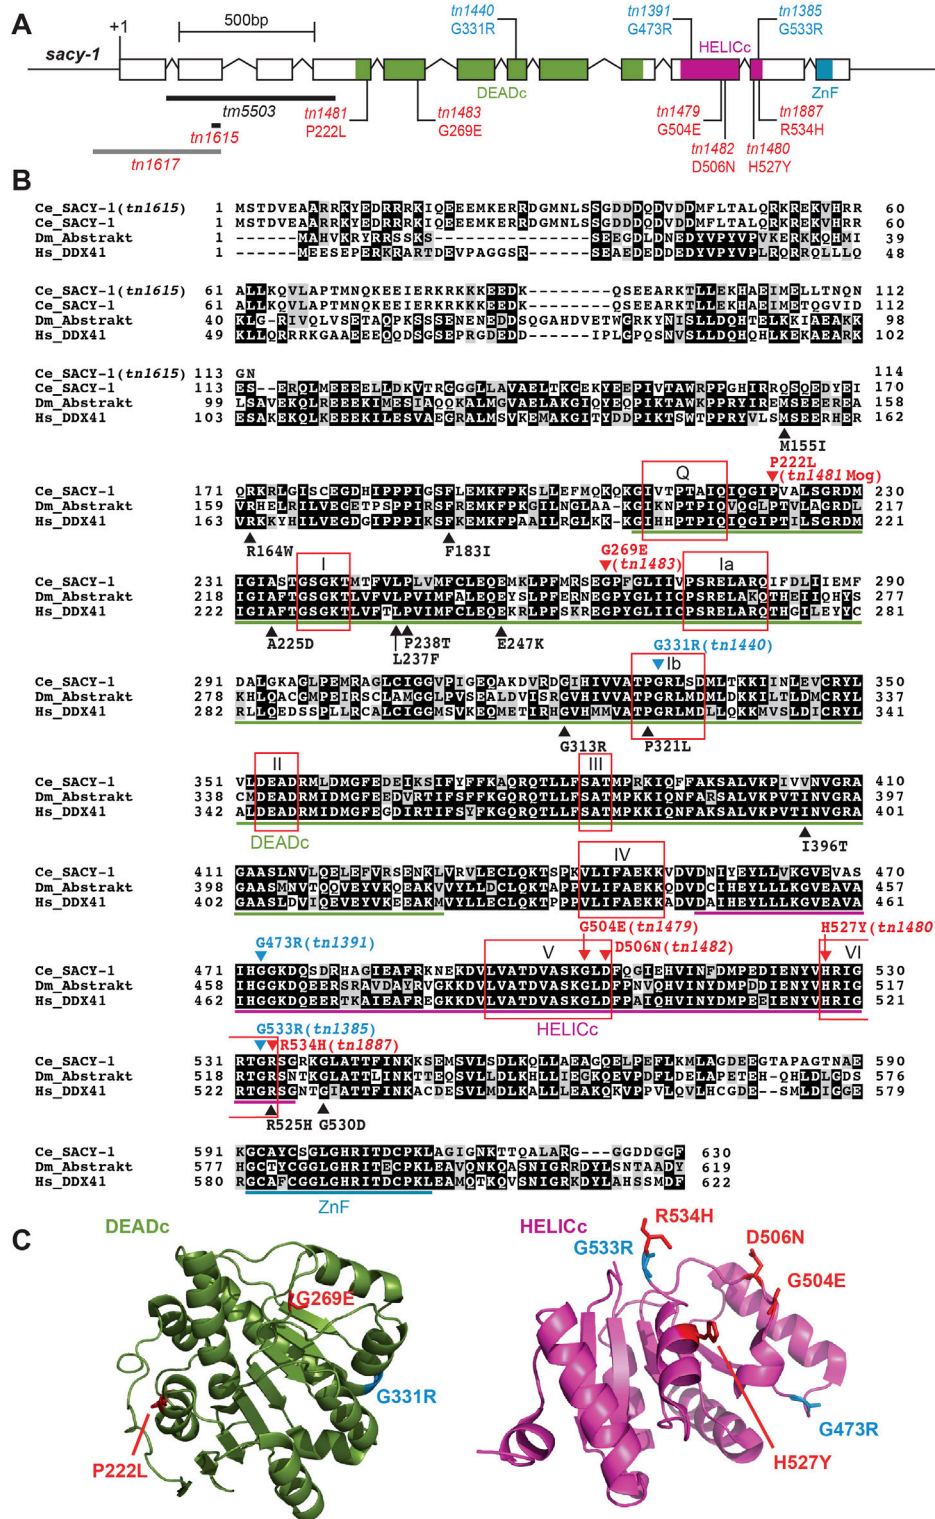

1186

1187 **Figure 1 (A)** The structure of *sacy-1*. Newly isolated mutations reported in this study are displayed in

1188 red font beneath the exons. The mutations in blue font shown above the exons were reported

1189 previously (Kim *et al.* 2012). The extent of two deletions, *tm5503* and *tn1615*, that result in *sacy-1*  
1190 null mutations are shown with black bars. A third deletion, *tn1617*, which is a reduction-of-function  
1191 mutation, is shown with a gray bar. (B) A protein sequence alignment of SACY-1 (NP\_491962.1),  
1192 *Drosophila* Abstract (NP\_524220.1), and human DDX41 (NP\_057306.2). Mutations isolated in *C.*  
1193 *elegans* are shown above that sequence, whereas the human mutations associated with myelodysplastic  
1194 syndromes are shown beneath the human sequence. Conserved domains [DEAD-box domain  
1195 (DEADc), helicase domain (HELICc), and zinc finger domain (ZnF)] and motifs (Q, I Ia, Ib, III, IV, V,  
1196 and VI) are indicated as described by Henn *et al.* (2012). (C) The locations of SACY-1 missense  
1197 mutations are shown on structures of the DDX41 DEADc (Omura *et al.* 2016) and HELICc (Schütz *et*  
1198 *al.* 2010) domains. The side chains of the amino acids in the human structure are labeled with amino  
1199 acid numbering that corresponds to the SACY-1 missense mutations in this study.

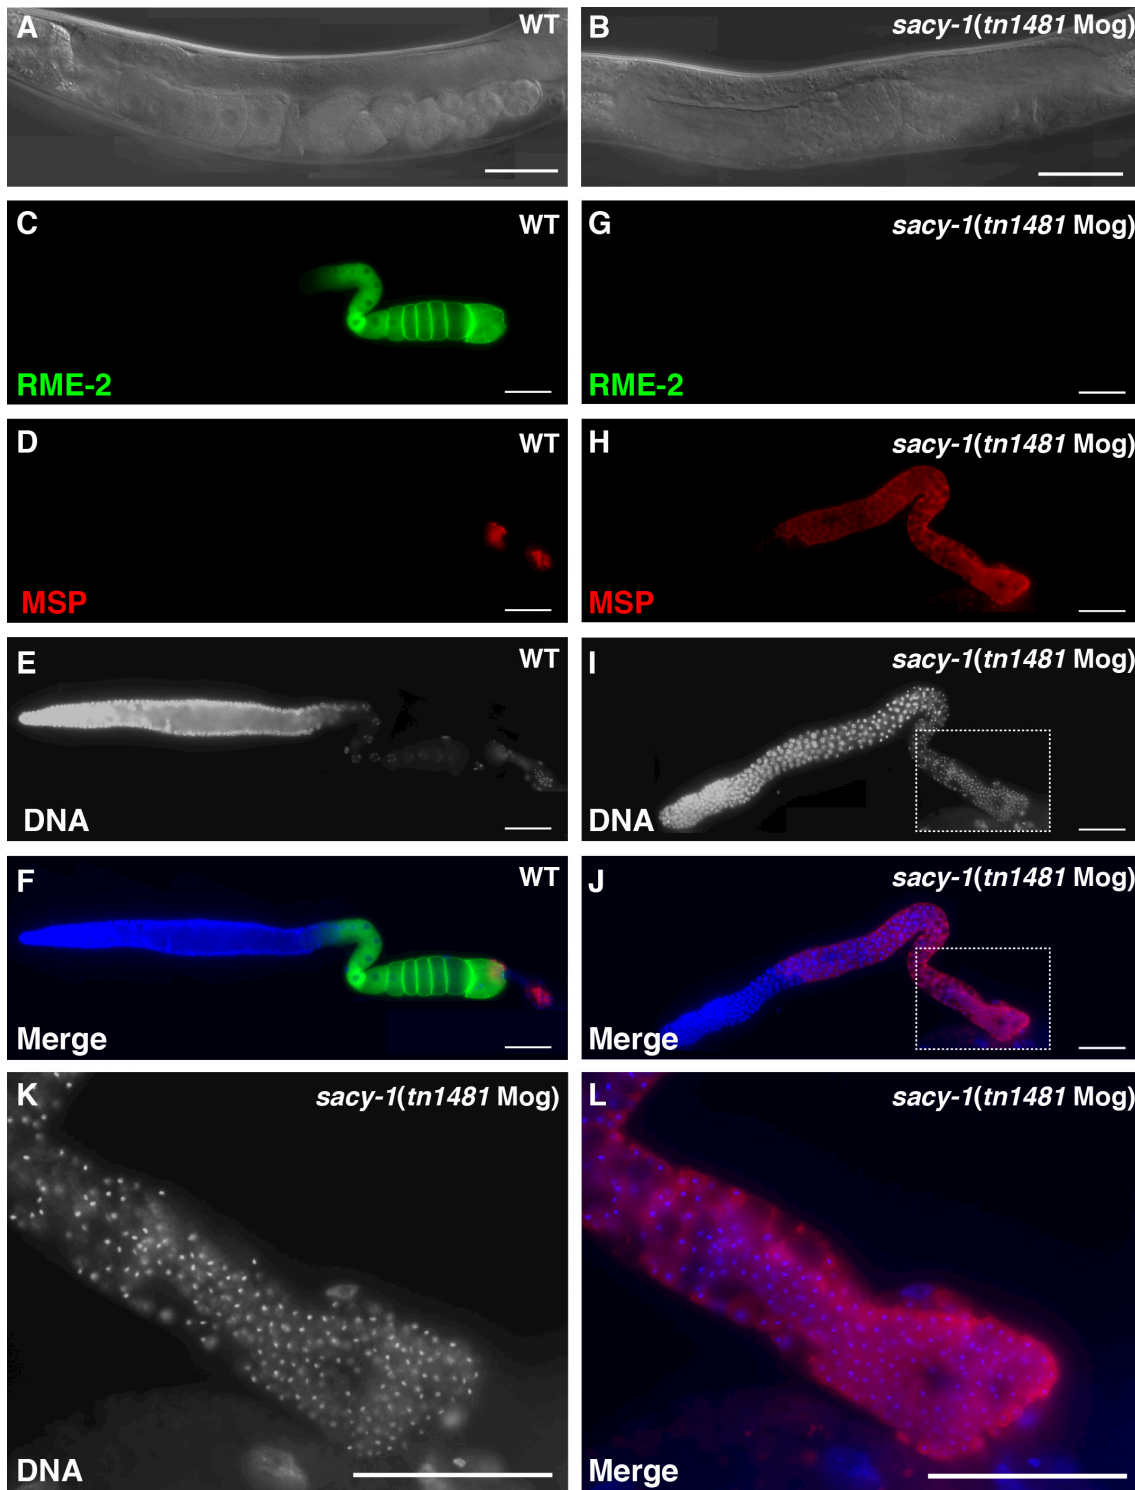

1200

1201

1202

1203

1204

**Figure 2** *sacy-1(tn1481)* adult hermaphrodites exhibit a masculinization of germline (Mog) sterile phenotype. DIC images of wild-type (A) and *sacy-1(tn1481)* (B) adult hermaphrodites. The wild-type animal contains oocytes and sperm and produces embryos but the *sacy-1(tn1481)* animal only produces sperm (arrow). (C–L) Dissected gonads stained for the RME-2 yolk receptor (C, G), the

1205 major sperm protein (D, H), or DNA (E, I, and K). Merged images are also shown (F, J, and L). The  
1206 *sacy-1(tn1481)* mutant overproduces sperm to the exclusion of oocytes and is sterile. This phenotype is  
1207 completely penetrant. Bars, 50  $\mu$ m.

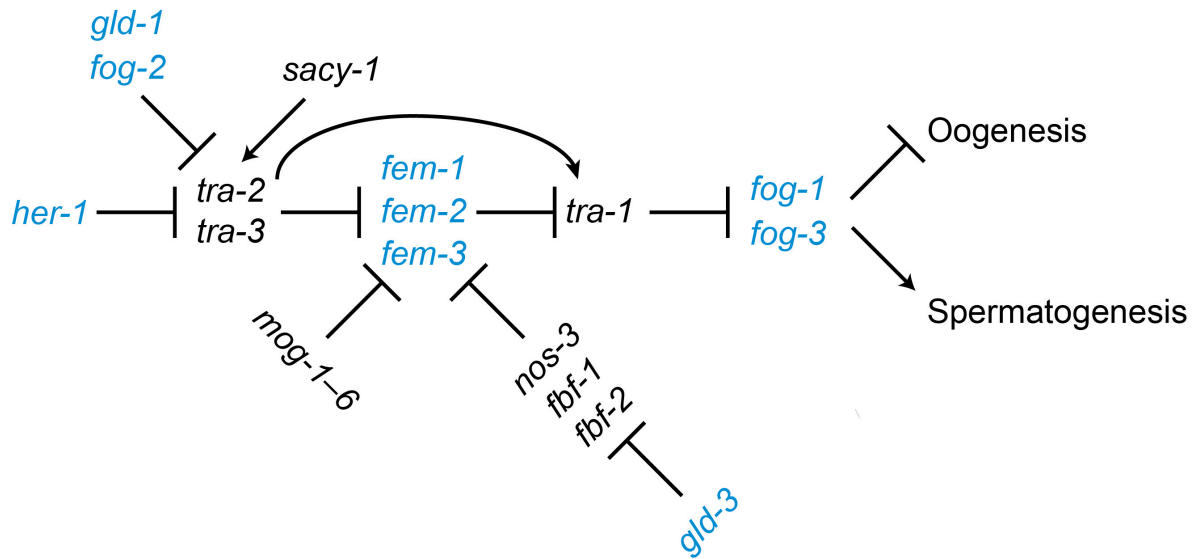

1208

1209 **Figure 3** The *C. elegans* germline sex determination pathway. Genes promoting the male and female  
1210 fate are shown in blue and black, respectively. *sacy-1* promotes the oocyte fate antagonistically to *fog-*  
1211 *2*, which promotes spermatogenesis.

*sacy-1(tm5503); tra-2(e2020)*

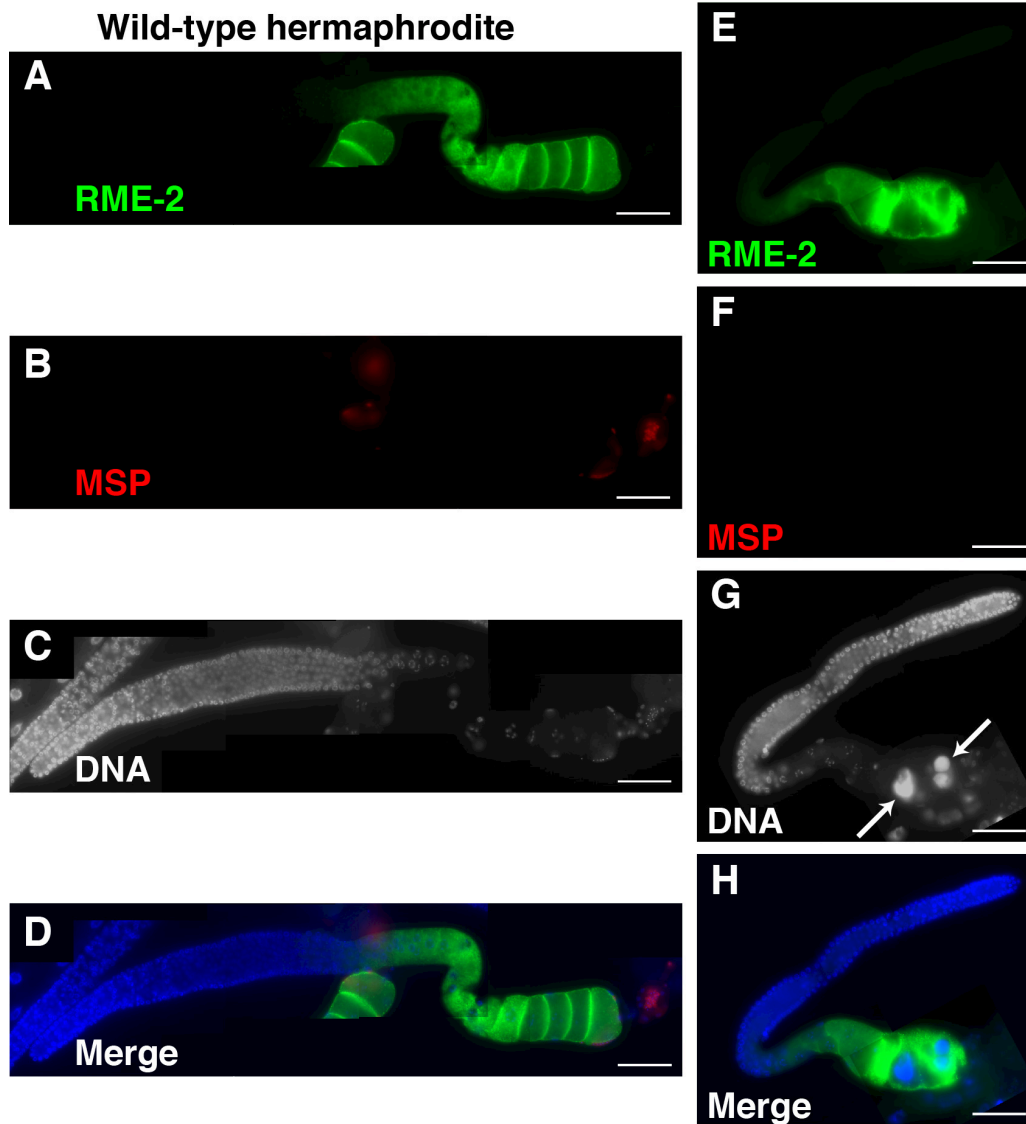

1212

1213 **Figure 4** Genetic interactions between *sacy-1* and *tra-2* in germline sex determination were analyzed  
1214 by combining the strong germline-feminizing dominant *tra-2(e2020)* mutation with the *sacy-*  
1215 *1(tm5503)* null mutation. Dissected gonads of wild-type hermaphrodites (A–D) and *sacy-1(tm5503);*  
1216 *tra-2(e2020)* females were analyzed by staining for the oocyte RME-2 yolk receptor (A and E) and the  
1217 major sperm protein (B and F). DNA was detected with DAPI (C and G). Merged images are also  
1218 shown (D and H). Note gonads from *sacy-1(tm5503); tra-2(e2020)* females do not express MSP and  
1219 frequently contain endomitotic oocytes (arrows). Bars, 50 μm.

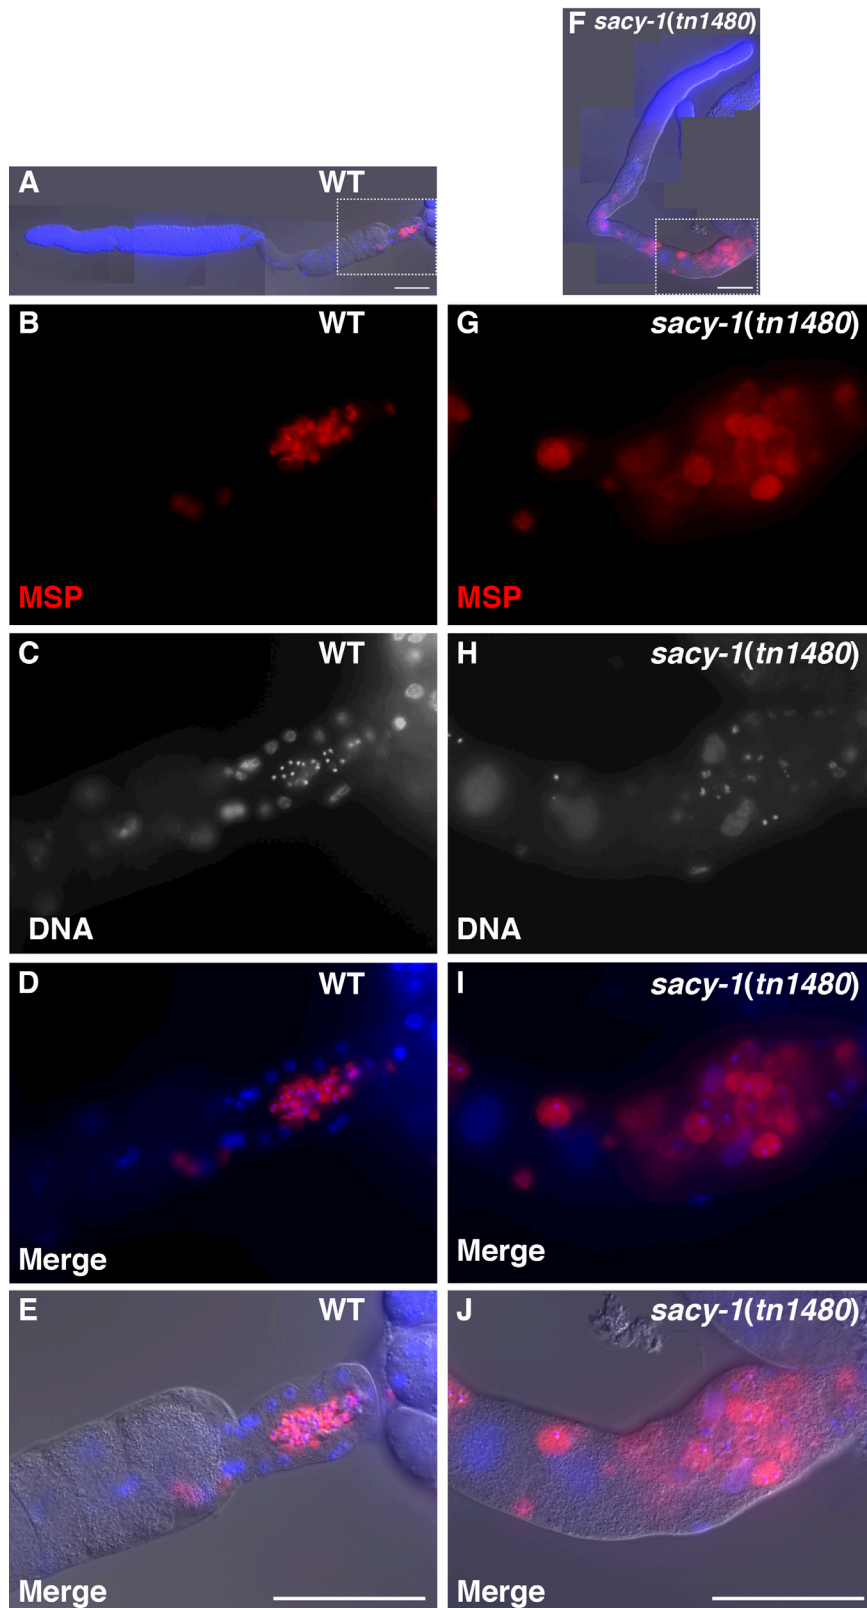

1220

1221 **Figure 5** Sperm-defective phenotype of *sacy-1(tn1480)* at 25°C. Dissected gonads of wild-type (A–E)

1222 and *sacy-1(tn1480)* (F–J) stained with anti-MSP antibodies (B, G) and DAPI to detect DNA (C, H).

1223 Merged images are also shown (A, D, E, F, I, and J). At 25°C, *sacy-1(tn1480)* hermaphrodites produce  
1224 swollen and abnormal sperm, which are incapable for fertilization. Note that defective sperm are also  
1225 found near the bend region in *sacy-1(tn1480)* adults (F) indicating that there is a defect in the sperm-  
1226 to-oocyte switch. Bars, 50 μm.



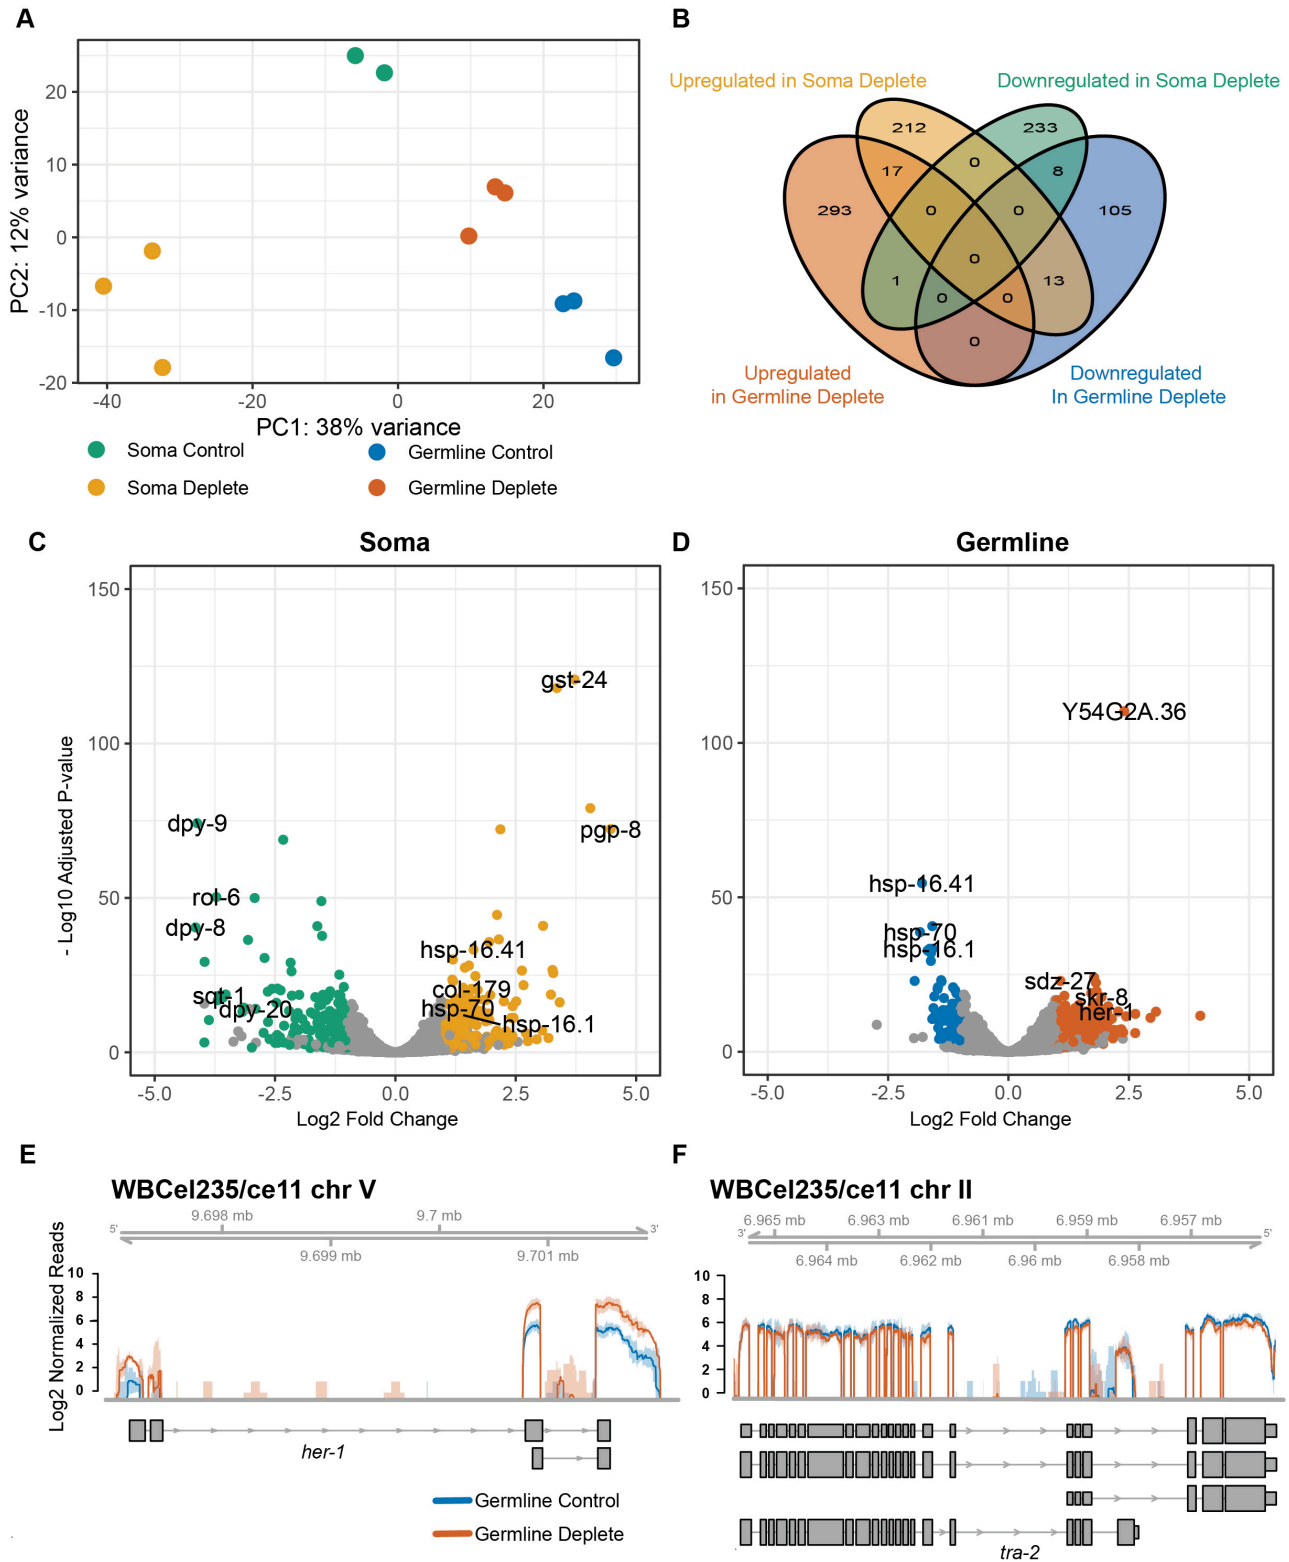

1227

1228 **Figure 6** Transcriptome changes upon SACY-1 depletion. (A) PCA comparison of RNA-seq data of  
 1229 controls strains and the experimental samples in which SACY-1 was depleted in the germline or soma,  
 1230 as indicated. Three biological replicates were analyzed for each sample; however, one of the control

1231 samples for the soma depletion exhibited evidence of RNA degradation and was excluded from the  
1232 analysis. (B) A Venn diagram showing the limited overlap of upregulated genes (2-fold; adjusted  
1233  $p < 0.05$ , FPKM deplete  $> 2.5$  and mean counts  $> 25$ ) and downregulated (2-fold; adjusted  $p < 0.05$ ,  
1234 FPKM control  $> 2.5$  and mean counts  $> 25$ ) genes in the RNA-seq datasets. (C, D) Volcano plots  
1235 showing the  $\log_2$  fold change in expression versus the  $-\log_{10}$  of the adjusted p value of genes  
1236 following SACY-1 depletion in the soma (C) or germline (D). (E, F) The normalized coverage of  
1237 sequencing reads across *her-1* (E) and *tra-2* (F) following depletion of SACY-1 in the germline. The  
1238 solid lines represent the mean of the biological replicates and shaded regions represent the  
1239 corresponding confidence interval. Note, the pattern of *tra-2* splicing is not affected.

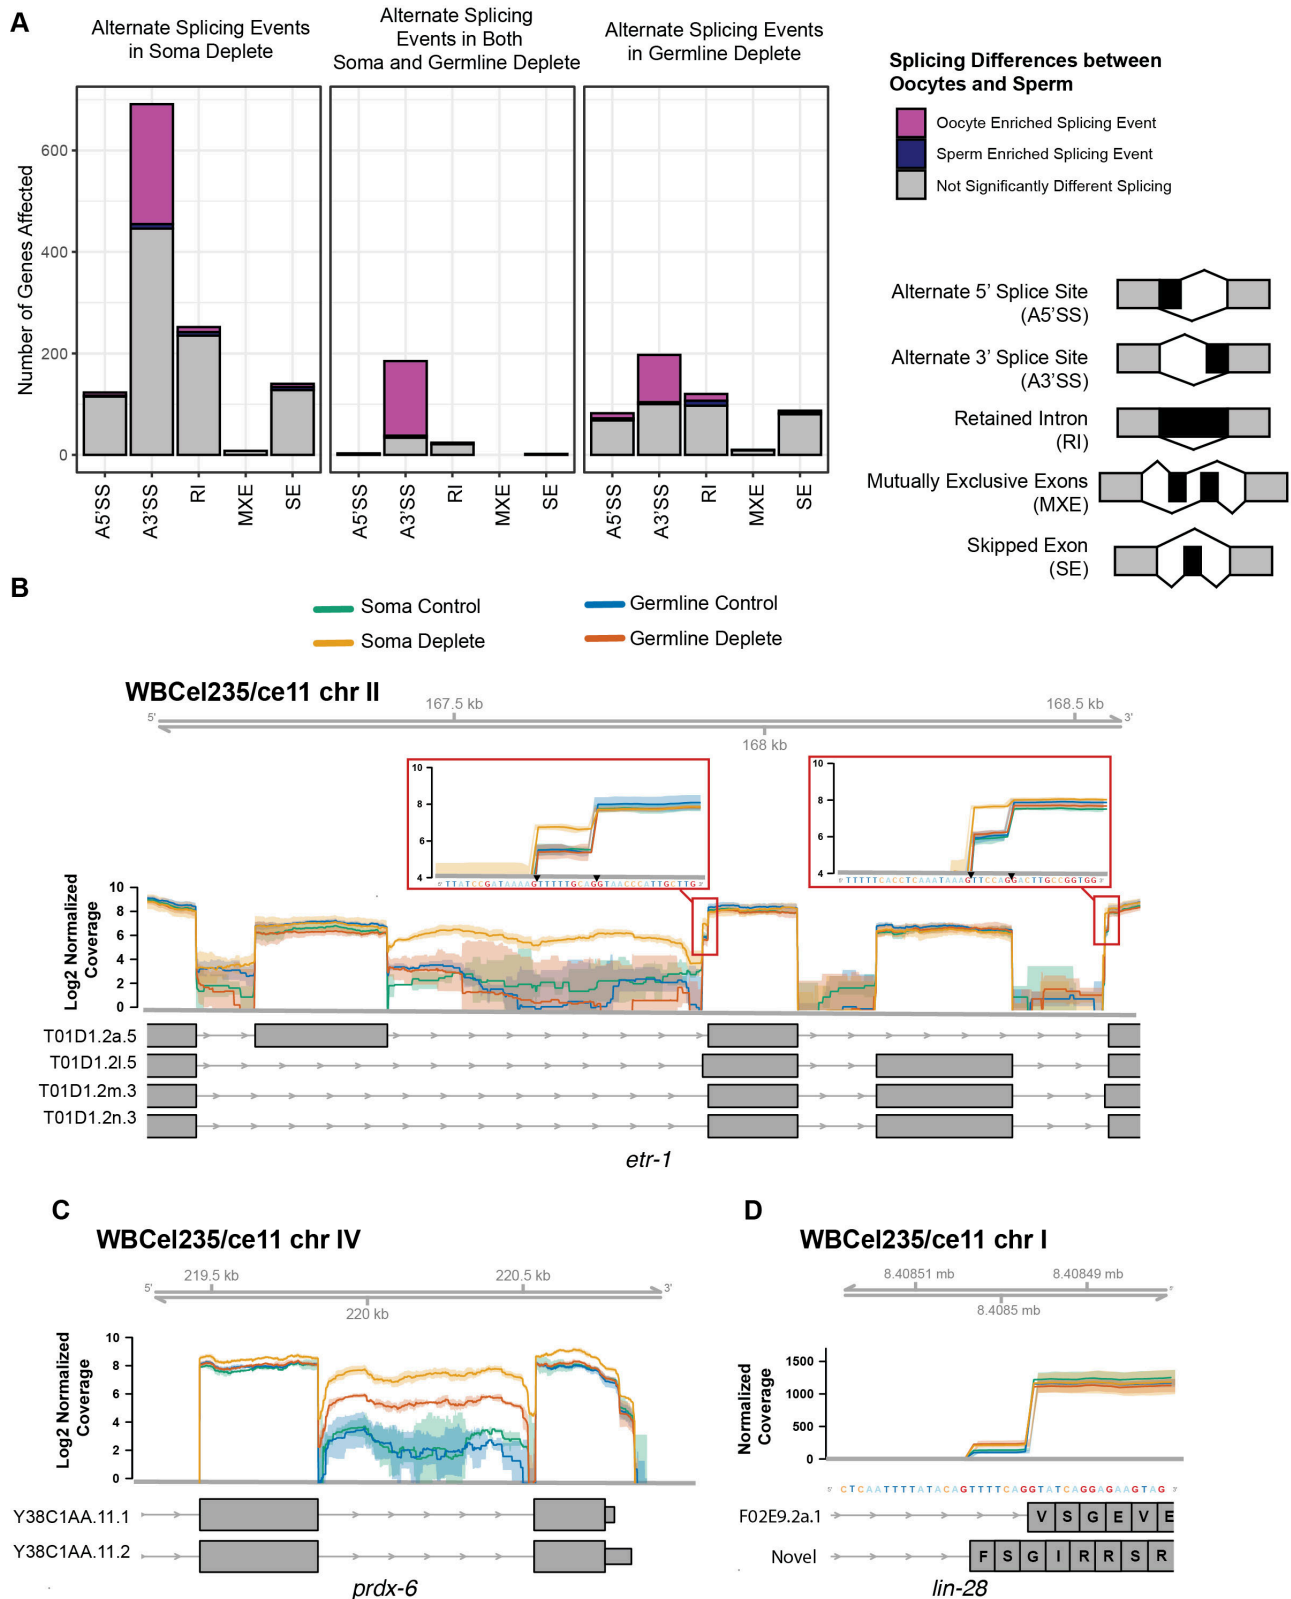

1240

1241

**Figure 7** Quantification of altered splicing patterns upon SACY-1 depletion. (A) Bar graphs showing

1242

the number of genes with statistically significant (FDR<0.05) changes in splicing patterns. The legend

1243 at the right depicts the nature of the observed splicing changes: A5'SS= Alternate 5' Splice Site,  
1244 A3'SS = Alternate 3' Splice Site, RI= Retained Intron, MXE=Mutually Exclusive Exons, SE=Skipped  
1245 Exon (B–D) Examples of alterations in splicing patterns following SACY-1 depletion in the germline  
1246 or soma as indicated. The *etr-1* gene shows pronounced intron retention and two alternatively spliced  
1247 3' sites in the SACY-1 soma depleted (gold) sample (B). A subset of *etr-1* transcript annotations are  
1248 shown. The *prdx-6* gene has a retained intron in the SACY-1 soma depleted (gold) and germline  
1249 depleted (red) samples (C). The soma and germline depleted samples have an increase in the usage of  
1250 alternate splice acceptor in the *lin-28* gene that results in an altered reading frame (D). The solid lines  
1251 represent the mean of the biological replicates and shaded regions represent the corresponding  
1252 confidence interval.
